# Supplementary material for: Global, Survival, and Apoptotic Transcriptome during Mouse and Human Early Embryonic Development
Source: Hindawi journal article supplement (doi:10.1155/2018/5895628), 2018-11-01
Supplement: f1 [file 5895628.f1.pdf]

Supplementary Table S1: Sequence of the forward and reverse primers used for the RT-qPCR analysis.

|       | Gene            | Primers                      |
|-------|-----------------|------------------------------|
| Human | <b>BCL2L10</b>  | GGATGGCTTTTGTCACTTCTTCAGG    |
|       |                 | ATAATCGTGTCCAGAGATAAATGAAGGC |
|       | <b>TNFRSF21</b> | AGAAGATTCGTGGGCTGATG         |
|       |                 | CCCTTGTTCTTGTCTGTGG          |
|       | <b>ENDOG</b>    | CGACACGTTCTACCTGAGCA         |
|       |                 | CTTGCCGATGACCTGGTACT         |
|       | <b>FGFR3</b>    | AACGTGATGAAGATCGCAGA         |
|       |                 | AGCGTGAAGATCTCCCAGAG         |
|       | <b>HPRT1</b>    | GCCAGACTTTGTTGGATTTGA        |
|       |                 | AAGCAGATGGCCACAGAACT         |
| Mouse | <b>TGFB2</b>    | TCGATAGCAAGGTTGTGAAA         |
|       |                 | CGAGCTCTTCGCTTTTATTC         |
|       | <b>CASP3</b>    | GATGGCTTGCCAGAAGATAC         |
|       |                 | GCGAGTGAGAATGTGCATAA         |
|       | <b>TNFSF13B</b> | CTTTGCTATGGGTCATGTCA         |
|       |                 | CGTGAAATCTGTGCATTCTC         |
|       | <b>TGFBR1</b>   | GCCCCTGAAGTTCTAGATGA         |
|       |                 | CATTTCTTCAACCGATGGAT         |
|       | <b>LBR</b>      | CTTGGCAATGATCTTGGTTA         |
|       |                 | GGAGGCTGTAGGTAATGGA          |

**Supplementary Table S2:** The 200 most up- and down-regulated in the EGA compared with the MII stage in human.

MII, metaphase II oocytes; EGA, embryonic genome activation stage.

| Gene ID      | Gene Name    | Fold Change | q-value(%) | Gene ID      | Gene Name | Fold Change | q-value(%) |
|--------------|--------------|-------------|------------|--------------|-----------|-------------|------------|
| 220184_at    | NANOG        | 2577,9      | 0          | 202157_s_at  | CUGBP2    | -129,3      | 0          |
| 220513_at    | C6orf148     | 1596,5      | 0          | 218006_s_at  | ZNF22     | -88,2       | 0,1150853  |
| 236914_at    | AW080028     | 1424,6      | 0,1150853  | 224964_s_at  | GNG2      | -66,1       | 0          |
| 1553619_a_at | TRIM43       | 1373,4      | 0,043577   | 212966_at    | HIC2      | -64,2       | 0          |
| 1552456_a_at | MBD3L2       | 853,5       | 0,0332986  | 1556009_at   | PEX13     | -55,3       | 0          |
| 1554036_at   | ZBTB24       | 695,4       | 0,8751441  | 203791_at    | DMXL1     | -54,9       | 0,1512685  |
| 228007_at    | C6orf204     | 624,7       | 0,3380039  | 229606_at    | Hs,634850 | -51,1       | 0          |
| 214603_at    | MAGEA2       | 567,1       | 0          | 222875_at    | DHX33     | -47,2       | 0          |
| 222867_s_at  | MED31        | 482,6       | 0          | 230051_at    | C10orf47  | -46,1       | 0          |
| 216034_at    | SUHW1        | 452,4       | 0          | 218170_at    | ISOC1     | -45,4       | 0          |
| 1552852_a_at | ZSCAN4       | 446,9       | 0          | 1554246_at   | C1orf210  | -44,6       | 0,043577   |
| 244206_at    | ANUBL1       | 324,9       | 0          | 226572_at    | SOCS7     | -42,9       | 0          |
| 205899_at    | CCNA1        | 317,1       | 0          | 239671_at    | Hs,614930 | -41,0       | 0,0509764  |
| 240301_at    | DPPA2        | 297,8       | 0          | 209484_s_at  | C1orf48   | -40,8       | 0          |
| 201548_s_at  | JARID1B      | 290,2       | 0          | 222673_x_at  | TMEM57    | -40,5       | 0          |
| 202499_s_at  | SLC2A3       | 285,8       | 0,1512685  | 222895_s_at  | BCL11B    | -40,1       | 0          |
| 239155_at    | LOC653108    | 283,7       | 0,0186691  | 229886_at    | FLJ32363  | -38,7       | 0          |
| 203957_at    | E2F6         | 251,8       | 0,6288738  | 226038_at    | LONRF1    | -37,5       | 0,0332986  |
| 205966_at    | TAF13        | 251,5       | 1,2299641  | 242702_at    | H10659    | -37,2       | 0,0509764  |
| 214097_at    | RPS21        | 245,3       | 0,3380039  | 223249_at    | CLDN12    | -37,0       | 0          |
| 209942_x_at  | MAGEA3       | 225,0       | 0,043577   | 219683_at    | FZD3      | -37,0       | 0          |
| 240318_at    | AFMID        | 223,2       | 0,066989   | 1562762_at   | C3orf56   | -35,9       | 0,0332986  |
| 220941_s_at  | C21orf91     | 213,9       | 0,043577   | 238444_at    | ZNF618    | -35,2       | 0,3380039  |
| 204124_at    | AF146796     | 202,0       | 0,1150853  | 226910_at    | Hs,432729 | -35,1       | 0,1150853  |
| 213718_at    | RBM4         | 199,9       | 0,2270814  | 226562_at    | ZNF690    | -34,8       | 0          |
| 222669_s_at  | SBDS         | 195,9       | 1,2299641  | 229908_s_at  | Hs,598368 | -33,8       | 0,0212465  |
| 221791_s_at  | CCDC72       | 188,9       | 0          | 239178_at    | Hs,197018 | -33,7       | 0          |
| 201483_s_at  | SUPT4H1      | 188,4       | 0,1150853  | 234994_at    | KIAA1913  | -33,6       | 0          |
| 1559108_at   | VPS53        | 184,0       | 1,2299641  | 202797_at    | SACM1L    | -32,2       | 0          |
| 207934_at    | RFPL1        | 179,8       | 0,4862106  | 225112_at    | ABI2      | -31,7       | 0,043577   |
| 212022_s_at  | MKI67        | 177,3       | 0          | 230288_at    | AW418619  | -31,5       | 0,0212465  |
| 201631_s_at  | IER3         | 176,6       | 0,0332986  | 224048_at    | USP44     | -31,4       | 0          |
| 223000_s_at  | F11R         | 176,5       | 0          | 215952_s_at  | OAZ1      | -30,9       | 0          |
| 230847_at    | T79870       | 174,2       | 0,8751441  | 218622_at    | NUP37     | -30,6       | 0,0332986  |
| 233737_s_at  | LOC284561    | 171,5       | 0          | 213626_at    | CBR4      | -30,6       | 0          |
| 1553697_at   | C1orf96      | 169,2       | 0,0186691  | 208296_x_at  | TNFAIP8   | -30,2       | 0,0509764  |
| 206207_at    | CLC          | 166,9       | 0,0899063  | 229085_at    | LRRC3B    | -29,7       | 0,8751441  |
| 213326_at    | VAMP1        | 165,0       | 0,0332986  | 228293_at    | DEPDC7    | -29,5       | 0,0212465  |
| 222801_s_at  | FLJ13195     | 161,7       | 0,0186691  | 1553064_at   | H1FOO     | -29,2       | 0,3380039  |
| 230362_at    | INPP5F       | 158,0       | 0          | 235520_at    | SUHW3     | -28,7       | 0          |
| 200853_at    | H2AFZ        | 149,5       | 0          | 224643_at    | LOC133619 | -28,5       | 0          |
| 230748_at    | SLC16A6      | 148,4       | 0,1150853  | 242617_at    | GSTZ1     | -28,4       | 0          |
| 215227_x_at  | ACPI         | 145,1       | 0          | 1554480_a_at | SVH       | -28,3       | 0,066989   |
| 239127_at    | Hs,446041    | 144,5       | 0,1512685  | 200958_s_at  | SDCBP     | -28,1       | 0          |
| 200085_s_at  | TCEB2        | 143,3       | 0,8751441  | 235727_at    | BTBD5     | -28,1       | 0,0212465  |
| 216001_at    | LOC390999    | 139,8       | 0,1512685  | 202615_at    | GNAQ      | -27,9       | 0          |
| 227724_at    | LOC642351    | 139,4       | 0          | 226181_at    | TUBE1     | -27,8       | 0          |
| 63009_at     | SHQ1         | 137,4       | 0,0899063  | 218361_at    | GOLPH3L   | -27,5       | 0,0212465  |
| 238912_x_at  | C9orf85      | 135,5       | 0,0332986  | 227146_at    | QSCN6L1   | -27,3       | 0,066989   |
| 204379_s_at  | FGFR3        | 133,6       | 0,2270814  | 225710_at    | Hs,173030 | -27,1       | 0,0509764  |
| 207227_x_at  | RFPL2        | 133,6       | 0,043577   | 222603_at    | KIAA1815  | -27,1       | 0,0509764  |
| 203224_at    | RFK          | 131,0       | 0,066989   | 212420_at    | ELF1      | -26,9       | 0,0509764  |
| 231339_at    | TSPYL6       | 128,6       | 0,1512685  | 205964_at    | ZNF426    | -26,9       | 0          |
| 213550_s_at  | AA993683     | 127,7       | 0,066989   | 212976_at    | R41498    | -26,8       | 0          |
| 207302_at    | SGCG         | 123,8       | 0,2270814  | 208424_s_at  | CIAPIN1   | -26,7       | 0,0509764  |
| 221263_s_at  | SF3B5        | 122,7       | 0,4862106  | 232204_at    | EBF       | -26,7       | 0          |
| 214882_s_at  | SFRS2        | 119,7       | 0          | 217985_s_at  | BAZ1A     | -26,5       | 0          |
| 228977_at    | IL17D        | 118,2       | 0,6288738  | 222848_at    | FKSG14    | -26,3       | 0          |
| 202431_s_at  | MYC          | 117,4       | 0          | 209760_at    | KIAA0922  | -26,3       | 0,0212465  |
| 231568_at    | RP6-166C19,1 | 114,2       | 0          | 204649_at    | TROAP     | -26,3       | 0,043577   |
| 238084_at    | PCGF3        | 113,7       | 0          | 227801_at    | TRIM59    | -25,9       | 0,0899063  |
| 229864_at    | TMEM103      | 112,3       | 0,1512685  | 208919_s_at  | NADK      | -25,6       | 0,1150853  |
| 214612_x_at  | MAGEA6       | 111,7       | 0,0186691  | 225835_at    | SLC12A2   | -25,5       | 0,0212465  |

|              |            |       |           |
|--------------|------------|-------|-----------|
| 203917_at    | CXADR      | 111,0 | 0,0332986 |
| 222857_s_at  | KCNMB4     | 109,7 | 0         |
| 222666_s_at  | RCL1       | 108,9 | 1,2299641 |
| 220399_at    | FLJ22639   | 108,8 | 1,2299641 |
| 242896_at    | BF223302   | 107,7 | 0         |
| 202391_at    | BASPI      | 107,5 | 0         |
| 209430_at    | BTAF1      | 104,4 | 0,043577  |
| 214960_at    | API5       | 100,7 | 0,043577  |
| 204883_s_at  | HUS1       | 100,0 | 0         |
| 200734_s_at  | ARF3       | 99,8  | 0         |
| 243161_x_at  | ZFP42      | 97,9  | 0,0509764 |
| 225152_at    | ZNF622     | 97,9  | 0         |
| 207574_s_at  | GADD45B    | 96,9  | 0,043577  |
| 238077_at    | KCTD6      | 96,8  | 0         |
| 1557257_at   | BCL10      | 96,8  | 0,1512685 |
| 213124_at    | ZNF473     | 96,4  | 0,0899063 |
| 230304_at    | Hs,143408  | 95,6  | 0,1150853 |
| 217365_at    | PRAMEF5    | 90,4  | 1,2299641 |
| 207438_s_at  | RNUT1      | 90,3  | 0,0186691 |
| 239377_at    | MGC11102   | 89,9  | 0,3380039 |
| 221970_s_at  | NOL11      | 89,2  | 0         |
| 214183_s_at  | TKTL1      | 86,9  | 2,4366888 |
| 223096_at    | NOP5/NOP58 | 85,4  | 0         |
| 204233_s_at  | CHKA       | 84,1  | 0,6288738 |
| 209836_x_at  | BOLA2      | 84,1  | 0,2270814 |
| 201174_s_at  | TERF2IP    | 83,5  | 0,2270814 |
| 243475_at    | CBL        | 81,7  | 0,066989  |
| 216302_at    | HNRPC      | 81,0  | 0,4862106 |
| 228875_at    | C6orf189   | 79,8  | 0,6288738 |
| 31874_at     | GAS2L1     | 79,6  | 0,1512685 |
| 222703_s_at  | YRDC       | 78,6  | 0,1512685 |
| 223857_x_at  | TMEM85     | 77,6  | 0         |
| 218379_at    | RBM7       | 77,2  | 0,1512685 |
| 226014_at    | EIF3S5     | 77,0  | 0,0899063 |
| 223773_s_at  | C1orf79    | 75,9  | 0,1150853 |
| 235245_at    | TMEM92     | 75,3  | 0         |
| 203094_at    | MAD2L1BP   | 75,0  | 0         |
| 206626_x_at  | SSX1       | 74,3  | 0,1512685 |
| 217958_at    | TRAPPC4    | 74,1  | 0         |
| 223391_at    | SGPP1      | 74,1  | 0         |
| 210467_x_at  | MAGEA12    | 74,0  | 0         |
| 213705_at    | Hs,592466  | 73,7  | 0         |
| 224610_at    | STX5       | 73,6  | 0         |
| 205780_at    | BIK        | 73,1  | 0,6288738 |
| 226565_at    | TMEM99     | 73,0  | 0,066989  |
| 205178_s_at  | RBBP6      | 71,1  | 0,1150853 |
| 207828_s_at  | CENPF      | 70,9  | 0,8751441 |
| 209757_s_at  | MYCN       | 70,8  | 0,0509764 |
| 1569077_x_at | FLJ16287   | 69,9  | 1,2299641 |
| 226419_s_at  | FLJ44342   | 69,7  | 0         |
| 218672_at    | SCNM1      | 69,6  | 0,0186691 |
| 209593_s_at  | TOR1B      | 69,5  | 0         |
| 209007_s_at  | C1orf63    | 69,0  | 0,0186691 |
| 214395_x_at  | EEF1D      | 68,9  | 0         |
| 205031_at    | EFNB3      | 68,0  | 0,8751441 |
| 221501_x_at  | LOC339047  | 67,9  | 0         |
| 1555301_a_at | DIP2A      | 67,0  | 0,4862106 |
| 203544_s_at  | STAM       | 65,8  | 0         |
| 209482_at    | POP7       | 63,7  | 0         |
| 218940_at    | C14orf138  | 63,6  | 0,043577  |
| 229790_at    | TERF2      | 63,6  | 0,043577  |
| 229106_at    | DYNLL2     | 63,0  | 0,0186691 |
| 205895_s_at  | NOLC1      | 62,9  | 0         |
| 205747_at    | CBLN1      | 62,5  | 0,1512685 |
| 228690_s_at  | NDUFA11    | 62,2  | 0,1512685 |
| 223787_s_at  | C3orf19    | 61,5  | 0,0332986 |
| 1555967_at   | Hs,21423   | 61,1  | 1,2299641 |

|              |              |       |           |
|--------------|--------------|-------|-----------|
| 229174_at    | AI688663     | -25,3 | 0         |
| 236219_at    | AI452512     | -25,1 | 0,2270814 |
| 227454_at    | TAOK1        | -25,1 | 0,4862106 |
| 219274_at    | TSPAN12      | -24,9 | 0         |
| 234725_s_at  | SEMA4B       | -24,8 | 0,1150853 |
| 226273_at    | LOC158563    | -24,6 | 0         |
| 202412_s_at  | USP1         | -24,2 | 0,0332986 |
| 202594_at    | LEPROTL1     | -24,1 | 0         |
| 205345_at    | BARD1        | -24,0 | 0         |
| 225961_at    | KLHDC5       | -23,9 | 0,0509764 |
| 226800_at    | KIAA1799     | -23,7 | 0         |
| 213729_at    | PRPF40A      | -23,5 | 0,0899063 |
| 235037_at    | TMEM41A      | -23,4 | 0         |
| 230875_s_at  | ATP11A       | -23,3 | 0         |
| 204759_at    | RCBTB2       | -23,0 | 0,0212465 |
| 224681_at    | GNA12        | -23,0 | 0,1150853 |
| 214464_at    | CDC42BPA     | -22,9 | 0,0899063 |
| 226050_at    | TMCO3        | -22,7 | 0         |
| 1569302_at   | KIAA1731     | -22,7 | 0,1512685 |
| 225761_at    | PAPD4        | -22,6 | 0         |
| 213249_at    | FBXL7        | -22,6 | 0,0332986 |
| 222708_s_at  | STX17        | -22,2 | 0,066989  |
| 41512_at     | Hs,530940    | -22,1 | 0,0212465 |
| 231920_s_at  | CSNK1G1      | -22,1 | 0,066989  |
| 204057_at    | IRF8         | -22,1 | 0,4862106 |
| 1554176_a_at | C3orf33      | -21,9 | 0         |
| 225361_x_at  | RP11-308B5,5 | -21,9 | 0         |
| 212053_at    | KIAA0251     | -21,9 | 0,0899063 |
| 228980_at    | RFFL         | -21,9 | 0,066989  |
| 234987_at    | C20orf118    | -21,9 | 0         |
| 218366_x_at  | METT11D1     | -21,8 | 0,1512685 |
| 204554_at    | PPP1R3D      | -21,8 | 0,0212465 |
| 209649_at    | STAM2        | -21,8 | 0         |
| 230718_at    | HSF5         | -21,8 | 0,1512685 |
| 201661_s_at  | ACSL3        | -21,8 | 0         |
| 205251_at    | PER2         | -21,7 | 0,0212465 |
| 218474_s_at  | KCTD5        | -21,6 | 0         |
| 224650_at    | MAL2         | -21,6 | 0,0509764 |
| 212074_at    | UNC84A       | -21,5 | 0         |
| 221905_at    | CYLD         | -21,4 | 0,043577  |
| 1552664_at   | FLCN         | -21,2 | 0,0332986 |
| 208777_s_at  | PSMD11       | -21,1 | 0         |
| 229114_at    | Hs,632864    | -20,9 | 0,0212465 |
| 206536_s_at  | BIRC4        | -20,9 | 0,0332986 |
| 1555886_at   | PDSS2        | -20,7 | 0         |
| 225864_at    | FAM84B       | -20,6 | 0,1150853 |
| 226026_at    | DIRC2        | -20,6 | 0,1150853 |
| 206138_s_at  | PIK4CB       | -20,3 | 0,1150853 |
| 201411_s_at  | PLEKHB2      | -20,2 | 0         |
| 225941_at    | EIF4E3       | -20,1 | 0         |
| 206588_at    | DAZL         | -19,9 | 0         |
| 221064_s_at  | C16orf28     | -19,8 | 0,0212465 |
| 226154_at    | DNM1L        | -19,8 | 0,043577  |
| 226383_at    | C11orf46     | -19,2 | 0,1512685 |
| 224937_at    | PTGFRN       | -19,1 | 0,0212465 |
| 235931_at    | AI332764     | -18,7 | 0         |
| 228390_at    | Hs,594773    | -18,3 | 0         |
| 229355_at    | Hs,595430    | -18,3 | 0         |
| 221675_s_at  | CHPT1        | -18,2 | 0,4862106 |
| 201841_s_at  | HSPB1        | -18,1 | 0,6288738 |
| 226284_at    | ZBTB2        | -18,0 | 0         |
| 213106_at    | AI769688     | -17,8 | 0         |
| 212676_at    | Hs,113577    | -17,7 | 0,1150853 |
| 201301_s_at  | ANXA4        | -17,6 | 0,0212465 |
| 220145_at    | ASAP         | -17,6 | 0,0509764 |
| 226666_at    | GPR135       | -17,3 | 0,0212465 |
| 231810_at    | BRI3BP       | -17,2 | 0,0332986 |

|              |           |      |           |
|--------------|-----------|------|-----------|
| 224444_s_at  | C1orf97   | 60,8 | 0,2270814 |
| 218882_s_at  | WDR3      | 60,5 | 0         |
| 200886_s_at  | PGAM1     | 60,1 | 0,0332986 |
| 214149_s_at  | ATP6V0E   | 59,5 | 0         |
| 226300_at    | MED19     | 59,2 | 0,1512685 |
| 1554245_x_at | ARL17P1   | 58,7 | 0         |
| 214224_s_at  | PIN4      | 58,2 | 0         |
| 57703_at     | SENP5     | 58,0 | 0         |
| 213826_s_at  | AA292281  | 57,8 | 0         |
| 214661_s_at  | C4orf9    | 57,6 | 0         |
| 208735_s_at  | CTDSP2    | 56,3 | 0,0186691 |
| 204030_s_at  | SCHIP1    | 55,6 | 0         |
| 221536_s_at  | LSG1      | 55,6 | 0,0899063 |
| 203847_s_at  | AKAP8     | 55,6 | 0         |
| 1553103_at   | NFX1      | 54,7 | 0,4862106 |
| 228135_at    | C1orf52   | 53,5 | 0         |
| 200664_s_at  | DNAJB1    | 52,7 | 0         |
| 241937_s_at  | WDR4      | 51,8 | 0,0899063 |
| 218188_s_at  | TMM13     | 51,5 | 0,4862106 |
| 202233_s_at  | UQCRH     | 51,3 | 0,043577  |
| 203705_s_at  | FZD7      | 51,3 | 0,1150853 |
| 225200_at    | ZCSL2     | 51,2 | 2,4366888 |
| 223560_s_at  | PRO1853   | 50,9 | 0,066989  |
| 210431_at    | ALPL2     | 50,8 | 0,0186691 |
| 231118_at    | ANKRD35   | 50,8 | 0,043577  |
| 218238_at    | GTPBP4    | 50,6 | 0,0509764 |
| 209418_s_at  | THOC5     | 50,5 | 0,1150853 |
| 238066_at    | RBP7      | 50,5 | 0,3380039 |
| 231119_at    | RFC3      | 50,3 | 0         |
| 226720_at    | MST101    | 50,2 | 0,0186691 |
| 46665_at     | SEMA4C    | 49,7 | 0,1150853 |
| 219138_at    | RPL14     | 49,4 | 0         |
| 244189_at    | KIAA1648  | 49,3 | 0,0186691 |
| 204285_s_at  | PMAIP1    | 49,1 | 1,7491695 |
| 204833_at    | ATG12     | 49,1 | 0         |
| 215093_at    | NSDHL     | 49,0 | 0         |
| 205217_at    | TMM8A     | 49,0 | 0,0899063 |
| 217883_at    | C2orf25   | 48,9 | 0         |
| 1558620_at   | ZNF621    | 48,4 | 0,1150853 |
| 235296_at    | EIF5A2    | 48,2 | 2,4366888 |
| 232097_at    | C14orf92  | 48,2 | 0,1512685 |
| 222380_s_at  | PDCD6     | 48,1 | 0,0899063 |
| 227909_at    | MGC39606  | 48,0 | 1,2299641 |
| 213847_at    | PRPH      | 47,7 | 0,1512685 |
| 213554_s_at  | CDV3      | 47,6 | 0         |
| 1562722_at   | FLJ40296  | 47,3 | 0,0332986 |
| 228301_x_at  | NDUFB10   | 47,1 | 0,0186691 |
| 208312_s_at  | PRAMEF1   | 47,1 | 0,6288738 |
| 236221_at    | AP4B1     | 46,9 | 0,3380039 |
| 201323_at    | EBNA1BP2  | 46,4 | 0,066989  |
| 244139_s_at  | AI435073  | 46,2 | 0,1150853 |
| 208720_s_at  | RNPC2     | 45,9 | 0,0186691 |
| 225687_at    | FAM83D    | 45,9 | 0         |
| 207936_x_at  | RFPL3     | 45,8 | 0,2270814 |
| 226175_at    | TTC9C     | 45,8 | 0,0186691 |
| 218189_s_at  | NANS      | 45,8 | 0         |
| 210757_x_at  | DAB2      | 45,3 | 0,8751441 |
| 219681_s_at  | RAB11FIP1 | 44,7 | 0,0899063 |
| 205545_x_at  | DNAJC8    | 44,5 | 0         |
| 222040_at    | HNRPA1    | 44,5 | 0,043577  |
| 219904_at    | ZSCAN5    | 44,4 | 0,0186691 |
| 223428_s_at  | KIAA1160  | 44,4 | 0,1150853 |
| 227278_at    | AI056692  | 44,2 | 0         |
| 201573_s_at  | ETF1      | 43,5 | 0,1150853 |
| 227603_at    | Hs.640243 | 43,3 | 0,6288738 |
| 210790_s_at  | SAR1A     | 43,2 | 0,2270814 |
| 225831_at    | LUZP1     | 42,7 | 0,066989  |

|              |              |       |           |
|--------------|--------------|-------|-----------|
| 210993_s_at  | SMAD1        | -17,1 | 0         |
| 212604_at    | MRPS31       | -17,1 | 0         |
| 218218_at    | DIP13B       | -17,0 | 0         |
| 218859_s_at  | C20orf6      | -16,9 | 0,0212465 |
| 227139_s_at  | HPS3         | -16,9 | 0,4862106 |
| 213064_at    | ZC3H14       | -16,9 | 0         |
| 223342_at    | RRM2B        | -16,8 | 0         |
| 204403_x_at  | KIAA0738     | -16,7 | 0,066989  |
| 219637_at    | ARMC9        | -16,6 | 0,0899063 |
| 219972_s_at  | C14orf135    | -16,6 | 0,1512685 |
| 213372_at    | PAQR3        | -16,5 | 0,066989  |
| 223693_s_at  | FLJ10324     | -16,5 | 0,2270814 |
| 203357_s_at  | CAPN7        | -16,5 | 0,043577  |
| 216060_s_at  | DAAM1        | -16,4 | 0         |
| 205883_at    | ZBTB16       | -16,4 | 0,3380039 |
| 226541_at    | FBXO30       | -16,3 | 0         |
| 228401_at    | ATAD2        | -16,3 | 0         |
| 210948_s_at  | LEF1         | -16,2 | 0,1512685 |
| 235241_at    | FLJ90709     | -16,2 | 0         |
| 213899_at    | METAP2       | -16,2 | 0,0509764 |
| 218698_at    | APIP         | -16,0 | 0,1150853 |
| 226751_at    | C2orf32      | -16,0 | 0,1512685 |
| 1562386_s_at | ZNF501       | -16,0 | 0,0509764 |
| 220321_s_at  | FLJ13646     | -16,0 | 0,3380039 |
| 201502_s_at  | NFKBIA       | -16,0 | 0,0332986 |
| 219736_at    | TRIM36       | -15,9 | 0         |
| 231862_at    | Hs.349283    | -15,9 | 0         |
| 233819_s_at  | ZNF294       | -15,9 | 0,3380039 |
| 202368_s_at  | TRAM2        | -15,9 | 0,1150853 |
| 201752_s_at  | ADD3         | -15,8 | 0,0509764 |
| 212812_at    | SERINC5      | -15,7 | 0,0509764 |
| 225847_at    | AADAACL1     | -15,7 | 0,1512685 |
| 202666_s_at  | ACTL6A       | -15,5 | 0         |
| 213216_at    | OTUD3        | -15,3 | 0,1512685 |
| 212083_at    | TEX261       | -15,3 | 0         |
| 201552_at    | LAMP1        | -15,2 | 0,0332986 |
| 223065_s_at  | STARD3NL     | -15,1 | 0,066989  |
| 234986_at    | Hs.596052    | -15,0 | 0,0509764 |
| 201880_at    | ARIH1        | -15,0 | 0,1150853 |
| 203306_s_at  | SLC35A1      | -14,8 | 0         |
| 47608_at     | TJAP1        | -14,8 | 0,0212465 |
| 226283_at    | WDR51B       | -14,7 | 0         |
| 1565834_a_at | BU177699     | -14,6 | 0,043577  |
| 215380_s_at  | C7orf24      | -14,6 | 0         |
| 202289_s_at  | TACC2        | -14,6 | 0,043577  |
| 226592_at    | LOC286334    | -14,6 | 0,043577  |
| 224436_s_at  | NIPSNAP3A    | -14,5 | 0         |
| 240770_at    | PRP2         | -14,5 | 0,4862106 |
| 222544_s_at  | WHSC1L1      | -14,4 | 0,3380039 |
| 224695_at    | C2orf29      | -14,2 | 0         |
| 218297_at    | C10orf97     | -14,1 | 0,1150853 |
| 204674_at    | LRMP         | -14,1 | 0,3380039 |
| 209055_s_at  | CDC5L        | -14,1 | 0,066989  |
| 223309_x_at  | IPLA2(GAMMA) | -14,0 | 0,0509764 |
| 233841_s_at  | SUDS3        | -14,0 | 0         |
| 208723_at    | USP11        | -14,0 | 0,043577  |
| 235103_at    | MAN2A1       | -14,0 | 0,1150853 |
| 221904_at    | C3orf40      | -14,0 | 0,0899063 |
| 243495_s_at  | Hs.624172    | -14,0 | 0         |
| 202016_at    | MEST         | -14,0 | 0,066989  |
| 219588_s_at  | LUZP5        | -13,8 | 0,1512685 |
| 204706_at    | INPP5E       | -13,8 | 0,1150853 |
| 221575_at    | SCLY         | -13,8 | 0,1150853 |
| 205190_at    | PLS1         | -13,7 | 0,0212465 |
| 232530_at    | LOC652226    | -13,7 | 0,4862106 |
| 228201_at    | ARL13B       | -13,7 | 0         |
| 225185_at    | MRAS         | -13,7 | 0,0212465 |

|             |           |      |           |
|-------------|-----------|------|-----------|
| 226297_at   | Hs,594939 | 42,6 | 0,0509764 |
| 202464_s_at | PFKFB3    | 42,1 | 0         |
| 217980_s_at | MRPL16    | 41,8 | 0         |

|             |           |       |           |
|-------------|-----------|-------|-----------|
| 215933_s_at | HHEX      | -13,7 | 0         |
| 203825_at   | BRD3      | -13,7 | 0,0509764 |
| 223358_s_at | Hs,527119 | -13,6 | 0         |

**Supplementary Table S3:** The 200 most up- and down-regulated in the BL compared with the MII stage in human. MII, metaphase II oocytes; BL, blastocysts.

| Gene ID     | Gene Name | Fold Change | q-value(%) |
|-------------|-----------|-------------|------------|
| 201596_x_at | KRT18     | 2240,8      | 0          |
| 227048_at   | LAMA1     | 1670,6      | 0          |
| 209262_s_at | NR2F6     | 1456,1      | 0          |
| 220139_at   | DNMT3L    | 1258,9      | 0          |
| 220513_at   | C6orf148  | 899,2       | 0,09957446 |
| 224972_at   | C20orf52  | 862,2       | 0          |
| 204379_s_at | FGFR3     | 817,8       | 0,01715523 |
| 201650_at   | KRT19     | 780,2       | 0,00679705 |
| 200085_s_at | TCEB2     | 753,8       | 0          |
| 205081_at   | CRIP1     | 711,4       | 0,03875166 |
| 202023_at   | EFNA1     | 682,3       | 0,05893542 |
| 205450_at   | PHKA1     | 676,9       | 0,00382982 |
| 223689_at   | IGF2BP1   | 612,1       | 0          |
| 202286_s_at | TACSTD2   | 580,7       | 0,01715523 |
| 202499_s_at | SLC2A3    | 575,6       | 0          |
| 202800_at   | SLC1A3    | 541,0       | 0          |
| 209604_s_at | GATA3     | 526,5       | 0          |
| 204351_at   | S100P     | 488,2       | 0,05893542 |
| 225660_at   | SEMA6A    | 396,9       | 0,00382982 |
| 205967_at   | HIST1H4C  | 378,9       | 0          |
| 221263_s_at | SF3B5     | 364,6       | 0          |
| 215729_s_at | VGLL1     | 349,3       | 0,03875166 |
| 229125_at   | ANKRD38   | 340,1       | 0,05893542 |
| 216379_x_at | CD24      | 323,5       | 0,00679705 |
| 213550_s_at | AA993683  | 311,5       | 0          |
| 45288_at    | ABHD6     | 297,6       | 0,03875166 |
| 210431_at   | ALPL2     | 296,1       | 0,15345984 |
| 224232_s_at | PX19      | 288,7       | 0          |
| 202598_at   | S100A13   | 278,5       | 0,00382982 |
| 211162_x_at | SCD       | 275,1       | 0,01361431 |
| 229332_at   | GLOXD1    | 269,8       | 0,00382982 |
| 233396_s_at | CSRP2BP   | 266,1       | 0          |
| 232191_at   | C21orf105 | 250,1       | 0          |
| 228690_s_at | NDUFA11   | 248,1       | 0          |
| 224932_at   | C22orf16  | 241,6       | 0,02565228 |
| 201278_at   | DAB2      | 230,1       | 0,00679705 |
| 212761_at   | TCF7L2    | 227,0       | 0,00912068 |
| 209735_at   | ABCG2     | 217,1       | 0          |
| 222435_s_at | UBE2J1    | 212,3       | 0          |
| 202626_s_at | LYN       | 211,7       | 0,02565228 |
| 200844_s_at | PRDX6     | 206,2       | 0          |
| 223000_s_at | F11R      | 204,7       | 0          |
| 209710_at   | GATA2     | 204,0       | 0,01361431 |
| 203709_at   | PHKG2     | 201,6       | 0,38816402 |
| 39248_at    | AQP3      | 192,3       | 0,00912068 |
| 33322_i_at  | SFN       | 191,1       | 0,02565228 |
| 203219_s_at | APRT      | 190,7       | 0,00382982 |
| 46665_at    | SEMA4C    | 190,0       | 0,00382982 |
| 204883_s_at | HUS1      | 188,8       | 0,00382982 |
| 221501_x_at | LOC339047 | 187,5       | 0          |
| 212444_at   | Hs.632997 | 185,7       | 0,03875166 |
| 216338_s_at | YIPF3     | 183,1       | 0          |
| 221791_s_at | CCDC72    | 182,1       | 0          |
| 210367_s_at | PTGES     | 181,8       | 0,00382982 |
| 214285_at   | FABP3     | 180,9       | 0,09957446 |
| 219138_at   | RPL14     | 178,3       | 0          |
| 226214_at   | MIR16     | 174,6       | 0          |
| 214097_at   | RPS21     | 169,8       | 0          |
| 209836_x_at | BOLA2     | 164,9       | 0,00382982 |
| 204538_x_at | NP1P      | 159,8       | 0,00382982 |
| 218454_at   | FLJ22662  | 155,6       | 0          |
| 223368_s_at | C9orf32   | 155,0       | 0          |

| Gene ID      | Gene Name    | Fold Change | q-value(%) |
|--------------|--------------|-------------|------------|
| 230288_at    | AW418619     | -589,1      | 0,00679705 |
| 220766_at    | BTG4         | -588,8      | 0          |
| 219932_at    | SLC27A6      | -504,9      | 0          |
| 234994_at    | KIAA1913     | -426,7      | 0          |
| 230645_at    | FRMD3        | -361,4      | 0          |
| 206588_at    | DAZL         | -349,0      | 0          |
| 226751_at    | C2orf32      | -337,8      | 0,03875166 |
| 227021_at    | AOF1         | -318,9      | 0          |
| 236491_at    | BCL2L10      | -298,6      | 0,01361431 |
| 211915_s_at  | LOC649679    | -268,9      | 0,05893542 |
| 217047_s_at  | FAM13A1      | -259,4      | 0          |
| 205190_at    | PLS1         | -248,4      | 0,00483604 |
| 206404_at    | FGF9         | -231,1      | 0,01715523 |
| 244475_at    | LOC646951    | -226,6      | 0,00912068 |
| 1562762_at   | C3orf56      | -205,7      | 0,00679705 |
| 203355_s_at  | PSD3         | -202,8      | 0          |
| 205529_s_at  | RUNX1T1      | -194,4      | 0          |
| 229738_at    | DNAH10       | -166,1      | 0,01361431 |
| 215933_s_at  | HHEX         | -152,3      | 0          |
| 232720_at    | LRRN6C       | -148,0      | 0          |
| 231386_at    | FLJ30851     | -145,5      | 0,01715523 |
| 223533_at    | LRRC8C       | -140,4      | 0,02565228 |
| 227022_at    | GNPDA2       | -138,9      | 0,00483604 |
| 224800_at    | WDFY1        | -132,2      | 0          |
| 215321_at    | RPIB9        | -131,3      | 0,01361431 |
| 226907_at    | PPP1R14C     | -117,9      | 0,01715523 |
| 216060_s_at  | DAAM1        | -117,3      | 0          |
| 212943_at    | KIAA0528     | -114,5      | 0,00483604 |
| 214053_at    | Hs.587035    | -114,4      | 0          |
| 222835_at    | THSD4        | -112,7      | 0,00912068 |
| 1553527_at   | NALP9        | -112,1      | 0          |
| 1554300_a_at | LOC136306    | -112,1      | 0,00679705 |
| 211596_s_at  | LRIG1        | -111,0      | 0,02565228 |
| 229606_at    | Hs.634850    | -110,9      | 0,00483604 |
| 223475_at    | CRISPLD1     | -110,1      | 0          |
| 220135_s_at  | SLC7A9       | -106,6      | 0,02565228 |
| 204759_at    | RCBTB2       | -105,0      | 0,00483604 |
| 227794_at    | GLYATL1      | -103,9      | 0,00483604 |
| 232692_at    | TDRD6        | -96,0       | 0,00679705 |
| 222291_at    | AI478795     | -95,0       | 0,01361431 |
| 226117_at    | TIFA         | -93,5       | 0,00483604 |
| 243346_at    | LMOD3        | -92,1       | 0,02565228 |
| 201242_s_at  | ATP1B1       | -91,4       | 0          |
| 212074_at    | UNC84A       | -87,8       | 0          |
| 219806_s_at  | C11orf75     | -86,7       | 0,00483604 |
| 227997_at    | IL17RD       | -85,5       | 0          |
| 219034_at    | PARP16       | -85,3       | 0,01715523 |
| 231474_at    | ECAT1        | -84,7       | 0,15345984 |
| 218311_at    | MAP4K3       | -84,0       | 0          |
| 1555775_a_at | ZAR1         | -84,0       | 0          |
| 213228_at    | PDE8B        | -80,6       | 0,00483604 |
| 205338_s_at  | DCT          | -80,3       | 0,01361431 |
| 205302_at    | IGFBP1       | -80,3       | 0          |
| 209392_at    | ENPP2        | -80,3       | 0          |
| 220653_at    | ZIM2         | -79,1       | 0          |
| 223374_s_at  | B3GALNT1     | -77,4       | 0          |
| 229085_at    | LRRC3B       | -76,4       | 0,38816402 |
| 226271_at    | GDAP1        | -74,4       | 0          |
| 213353_at    | ABCA5        | -71,6       | 0,00912068 |
| 225101_s_at  | SNX14        | -71,0       | 0,00679705 |
| 223503_at    | DKFZP566N034 | -70,7       | 0          |
| 209804_at    | DCLRE1A      | -70,3       | 0,00912068 |

|              |             |       |            |
|--------------|-------------|-------|------------|
| 213720_s_at  | SMARCA4     | 152,4 | 0          |
| 222392_x_at  | PERP        | 150,2 | 0          |
| 50221_at     | TFEB        | 150,0 | 1,13755209 |
| 207357_s_at  | GALNT10     | 144,6 | 0,01715523 |
| 201483_s_at  | SUPT4H1     | 143,7 | 0          |
| 222496_s_at  | FLJ20273    | 142,1 | 0,00382982 |
| 219155_at    | PITPNC1     | 141,5 | 0,00912068 |
| 212048_s_at  | YARS        | 140,9 | 0          |
| 225516_at    | SLC7A2      | 139,9 | 0,00382982 |
| 203234_at    | UPP1        | 139,9 | 0          |
| 209191_at    | TUBB6       | 139,6 | 0          |
| 202830_s_at  | SLC37A4     | 138,7 | 0          |
| 208613_s_at  | FLNB        | 138,0 | 0,00679705 |
| 232164_s_at  | EPPK1       | 137,1 | 0,01361431 |
| 218357_s_at  | TIMM8B      | 137,0 | 0          |
| 31874_at     | GAS2L1      | 135,9 | 0,02565228 |
| 201757_at    | NDUFS5      | 129,3 | 0          |
| 243161_x_at  | ZFP42       | 127,1 | 0,00382982 |
| 224646_x_at  | H19         | 126,9 | 0,67162846 |
| 208510_s_at  | PPARG       | 125,4 | 0,01715523 |
| 240301_at    | DPPA2       | 125,2 | 0,00382982 |
| 201275_at    | FDPS        | 124,5 | 0,00382982 |
| 228462_at    | IRX2        | 122,8 | 0          |
| 224233_s_at  | MSTO1       | 122,4 | 0          |
| 228301_x_at  | NDUFB10     | 121,4 | 0          |
| 212424_at    | PDCD11      | 121,3 | 0          |
| 203047_at    | STK10       | 120,7 | 0,15345984 |
| 218672_at    | SCNM1       | 120,5 | 0,00382982 |
| 223773_s_at  | C1orf79     | 119,4 | 0,00382982 |
| 204416_x_at  | APOC1       | 118,8 | 0,00912068 |
| 202306_at    | POLR2G      | 117,8 | 0          |
| 212203_x_at  | IFITM3      | 116,9 | 0,00382982 |
| 200824_at    | GSTP1       | 116,7 | 0,01361431 |
| 200820_at    | PSMD8       | 116,2 | 0          |
| 219681_s_at  | RAB11FIP1   | 115,8 | 0          |
| 218856_at    | TNFRSF21    | 115,0 | 0,09957446 |
| 212411_at    | IMP4        | 111,8 | 0          |
| 221779_at    | MICAL-L1    | 110,6 | 0,01361431 |
| 229498_at    | Hs.291319   | 110,4 | 0,01715523 |
| 224864_at    | SRA1        | 110,0 | 0          |
| 1559946_s_at | RUVBL2      | 108,8 | 0          |
| 217221_x_at  | RBM10       | 108,0 | 0,01361431 |
| 209757_s_at  | MYCN        | 107,5 | 0          |
| 229074_at    | Hs.598990   | 105,4 | 0          |
| 202391_at    | BASP1       | 105,3 | 0          |
| 218188_s_at  | TIMM13      | 104,3 | 0,00382982 |
| 223075_s_at  | C9orf58     | 103,5 | 0,05893542 |
| 225321_s_at  | PILRB       | 103,3 | 0          |
| 226419_s_at  | FLJ44342    | 101,7 | 0,00382982 |
| 202937_x_at  | CTA-126B4.3 | 101,1 | 0,02565228 |
| 227829_at    | GYLTL1B     | 100,2 | 0,00382982 |
| 202790_at    | CLDN7       | 97,7  | 0,00382982 |
| 209482_at    | POP7        | 97,6  | 0          |
| 210517_s_at  | AKAP12      | 96,0  | 0,01361431 |
| 204044_at    | QPRT        | 95,9  | 0,00912068 |
| 203957_at    | E2F6        | 95,8  | 0          |
| 211025_x_at  | COX5B       | 95,3  | 0          |
| 203114_at    | SSSCA1      | 95,0  | 0          |
| 231195_at    | FLJ44186    | 94,8  | 0,00382982 |
| 212022_s_at  | MKI67       | 94,5  | 0          |
| 215227_x_at  | ACP1        | 94,4  | 0          |
| 1555895_at   | DNM2        | 93,3  | 0          |
| 218385_at    | MRPS18A     | 92,8  | 0          |
| 203416_at    | CD53        | 92,4  | 0,01715523 |
| 226553_at    | TMPRSS2     | 91,3  | 0,15345984 |
| 201573_s_at  | ETF1        | 91,2  | 0          |

|              |           |       |            |
|--------------|-----------|-------|------------|
| 227609_at    | EPSTI1    | -69,7 | 0          |
| 223162_s_at  | LCHN      | -69,5 | 0,00912068 |
| 235736_at    | Hs.178144 | -69,5 | 0,00483604 |
| 218793_s_at  | SCML1     | -69,4 | 0,00912068 |
| 221314_at    | GDF9      | -68,9 | 0          |
| 1565579_at   | Hs.611748 | -68,7 | 0,02565228 |
| 220116_at    | KCNN2     | -68,3 | 0,00912068 |
| 237254_at    | SLC5A11   | -67,3 | 0,09957446 |
| 229886_at    | FLJ32363  | -66,7 | 0          |
| 203531_at    | CUL5      | -66,6 | 0,02565228 |
| 226572_at    | SOC57     | -66,2 | 0          |
| 228260_at    | ELAVL2    | -65,9 | 0,01715523 |
| 241360_at    | CCDC15    | -65,8 | 0,00912068 |
| 229355_at    | Hs.595430 | -64,7 | 0          |
| 1553086_at   | C11orf40  | -64,5 | 0          |
| 232087_at    | CXorf23   | -63,2 | 0          |
| 229908_s_at  | Hs.598368 | -61,5 | 0,00483604 |
| 228454_at    | MLR2      | -61,3 | 0          |
| 230889_at    | LOC645321 | -61,3 | 0,67162846 |
| 222552_at    | GOLT1B    | -61,3 | 0          |
| 223693_s_at  | FLJ10324  | -60,7 | 0,05893542 |
| 224452_s_at  | MGC12966  | -60,3 | 0,01361431 |
| 213106_at    | AI769688  | -59,7 | 0          |
| 204776_at    | THBS4     | -59,6 | 0,00483604 |
| 209884_s_at  | SLC4A7    | -59,1 | 0          |
| 226181_at    | TUBE1     | -58,7 | 0          |
| 210495_x_at  | FN1       | -58,5 | 0,03875166 |
| 213249_at    | FBXL7     | -58,5 | 0,00679705 |
| 219515_at    | PRDM10    | -58,4 | 0          |
| 239061_at    | TPRXL     | -58,3 | 0,02565228 |
| 204284_at    | PPP1R3C   | -57,8 | 1,9395689  |
| 226562_at    | ZNF690    | -57,5 | 0          |
| 230626_at    | TSPAN12   | -57,3 | 0,01715523 |
| 203011_at    | IMPA1     | -57,3 | 0          |
| 226273_at    | LOC158563 | -55,9 | 0          |
| 229091_s_at  | CCNJ      | -55,9 | 0          |
| 204137_at    | GPR137B   | -55,9 | 0,02565228 |
| 202388_at    | RGS2      | -55,4 | 0,01361431 |
| 202797_at    | SACMIL    | -55,0 | 0,00483604 |
| 229459_at    | FAM19A5   | -54,5 | 0,01361431 |
| 1552531_a_at | NALP11    | -54,4 | 0,00483604 |
| 204057_at    | IRF8      | -54,3 | 0,26525376 |
| 206613_s_at  | TAF1A     | -54,2 | 0,02565228 |
| 230543_at    | AI761675  | -54,0 | 0,38816402 |
| 1556096_s_at | UNC13C    | -53,5 | 0          |
| 225655_at    | UHRF1     | -53,0 | 0          |
| 218191_s_at  | LMBRD1    | -52,6 | 0,00483604 |
| 205964_at    | ZNF426    | -52,5 | 0          |
| 242334_at    | NALP4     | -52,4 | 0,01361431 |
| 204980_at    | CLOCK     | -52,0 | 0          |
| 221064_s_at  | C16orf28  | -51,7 | 0,00483604 |
| 238584_at    | IQCA      | -51,6 | 0,00912068 |
| 223342_at    | RRM2B     | -51,1 | 0          |
| 1555883_s_at | SPIN3     | -50,9 | 0          |
| 203037_s_at  | MTSS1     | -50,7 | 0,15345984 |
| 219947_at    | CLEC4A    | -49,9 | 0,00912068 |
| 51158_at     | LOC400451 | -49,8 | 0,05893542 |
| 218297_at    | C10orf97  | -48,3 | 0,02565228 |
| 223249_at    | CLDN12    | -47,5 | 0,00483604 |
| 226980_at    | DEPDC1B   | -47,3 | 0          |
| 1561673_at   | Hs.434703 | -47,1 | 0          |
| 210314_x_at  | TNFSF13   | -47,0 | 0          |
| 1557085_at   | TMEM122   | -46,9 | 0,00679705 |
| 207443_at    | NR2E1     | -46,5 | 0,03875166 |
| 227475_at    | FOXQ1     | -46,2 | 0          |
| 203357_s_at  | CAPN7     | -45,8 | 0,00912068 |

|              |              |      |            |
|--------------|--------------|------|------------|
| 227998_at    | S100A16      | 91,2 | 0          |
| 226296_s_at  | MRPS15       | 89,7 | 0          |
| 200005_at    | EIF3S7       | 89,2 | 0          |
| 209219_at    | RDBP         | 87,3 | 0          |
| 219648_at    | DSU          | 86,9 | 0,01361431 |
| 219117_s_at  | FKBP11       | 86,8 | 0,00679705 |
| 210087_s_at  | MPZL1        | 86,7 | 0          |
| 218408_at    | TIMM10       | 86,6 | 0          |
| 200029_at    | RPL19        | 86,4 | 0          |
| 201998_at    | ST6GAL1      | 86,2 | 0          |
| 208700_s_at  | TKT          | 86,1 | 0          |
| 226213_at    | ERBB3        | 85,4 | 1,13755209 |
| 200826_at    | SNRPD2       | 84,8 | 0          |
| 231236_at    | ZFP57        | 83,5 | 0          |
| 203663_s_at  | COX5A        | 83,1 | 0          |
| 212270_x_at  | RPL17        | 83,0 | 0          |
| 215230_x_at  | EIF3S8       | 83,0 | 0          |
| 204141_at    | TUBB2A       | 82,6 | 0,01715523 |
| 225150_s_at  | RTKN         | 82,5 | 0,00382982 |
| 228303_at    | Hs.505575    | 81,7 | 0,05893542 |
| 228654_at    | RP11-93B10.1 | 80,5 | 0          |
| 202233_s_at  | UQCRH        | 80,0 | 0          |
| 221245_s_at  | C2orf31      | 79,6 | 0          |
| 211730_s_at  | POLR2L       | 79,2 | 0          |
| 201903_at    | UQCRC1       | 79,1 | 0          |
| 210381_s_at  | CCKBR        | 78,9 | 0,01361431 |
| 202857_at    | TMEM4        | 78,7 | 0          |
| 204237_at    | GULP1        | 78,3 | 0          |
| 225739_at    | RAB11FIP4    | 78,2 | 0,00679705 |
| 219735_s_at  | TFCP2L1      | 77,4 | 0,02565228 |
| 214661_s_at  | C4orf9       | 77,3 | 0          |
| 1557094_at   | Hs.626656    | 77,3 | 0,00679705 |
| 219646_at    | FLJ20186     | 77,0 | 0,00382982 |
| 200012_x_at  | RPL21        | 76,9 | 0          |
| 225967_s_at  | LOC284184    | 76,3 | 0          |
| 230972_at    | ANKRD9       | 76,2 | 0,00912068 |
| 213460_x_at  | NSUN5C       | 76,1 | 0,00382982 |
| 223391_at    | SGPP1        | 75,7 | 0          |
| 225788_at    | C6orf153     | 75,3 | 0          |
| 201244_s_at  | RAF1         | 75,2 | 0          |
| 224469_s_at  | C14orf151    | 75,1 | 0          |
| 209122_at    | ADFP         | 74,8 | 0,03875166 |
| 218278_at    | WDR74        | 74,5 | 0          |
| 201428_at    | CLDN4        | 74,4 | 0,01361431 |
| 1558007_s_at | LCMT1        | 74,3 | 1,9395689  |
| 211986_at    | AHNAK        | 74,1 | 0,00382982 |
| 58696_at     | EXOSC4       | 74,0 | 0          |
| 229711_s_at  | MGC5370      | 73,2 | 0,01715523 |
| 223207_x_at  | PHPT1        | 72,7 | 0,01715523 |
| 201066_at    | CYC1         | 72,7 | 0          |
| 213348_at    | CDKN1C       | 71,9 | 0,67162846 |
| 205829_at    | HSD17B1      | 71,1 | 0          |
| 218571_s_at  | CHMP4A       | 70,8 | 0          |
| 209418_s_at  | THOC5        | 70,7 | 0          |
| 218281_at    | MRPL48       | 70,5 | 0          |
| 203025_at    | ARD1A        | 70,4 | 0          |
| 223839_s_at  | Hs.597496    | 70,3 | 0          |
| 203782_s_at  | POLRMT       | 70,1 | 0          |
| 217755_at    | HN1          | 69,4 | 0          |
| 224301_x_at  | H2AFJ        | 68,7 | 0,01715523 |
| 201416_at    | SOX4         | 68,7 | 0,00382982 |
| 207585_s_at  | RPL36AL      | 68,6 | 0          |
| 212116_at    | RFP          | 68,2 | 0          |
| 224610_at    | STX5         | 67,9 | 0          |
| 31845_at     | ELF4         | 67,9 | 0,01361431 |
| 218526_s_at  | RANGRF       | 67,8 | 0          |

|              |              |       |            |
|--------------|--------------|-------|------------|
| 238944_at    | Hs.623967    | -45,6 | 0,09957446 |
| 218543_s_at  | PARP12       | -45,5 | 0,03875166 |
| 206794_at    | ERBB4        | -45,0 | 0,15345984 |
| 214769_at    | Hs.592809    | -44,5 | 0          |
| 236347_at    | MMAA         | -44,0 | 0,00483604 |
| 226925_at    | ACPL2        | -43,9 | 0          |
| 229475_at    | MAEL         | -43,8 | 0          |
| 203156_at    | AKAP11       | -43,7 | 0,01361431 |
| 202918_s_at  | PREI3        | -43,6 | 0          |
| 219683_at    | FZD3         | -43,5 | 0          |
| 233903_s_at  | SGEF         | -43,5 | 0,00679705 |
| 229105_at    | GPR39        | -43,3 | 0,00679705 |
| 226956_at    | LOC400924    | -43,3 | 0          |
| 204900_x_at  | SAP30        | -43,3 | 0,01361431 |
| 1555396_s_at | LOC340602    | -43,2 | 0,01715523 |
| 207819_s_at  | ABCB4        | -42,8 | 1,13755209 |
| 228927_at    | ZNF397       | -42,8 | 0          |
| 204221_x_at  | GLIPR1       | -42,8 | 0          |
| 232422_at    | RP11-151A6.2 | -42,7 | 0,00912068 |
| 222437_s_at  | VPS24        | -42,5 | 0,00483604 |
| 227539_at    | Hs.596900    | -42,1 | 0,00912068 |
| 231731_at    | OTX2         | -42,1 | 0          |
| 222550_at    | ARMC1        | -42,0 | 0          |
| 227454_at    | TAOK1        | -41,5 | 0,15345984 |
| 204554_at    | PPP1R3D      | -41,3 | 0,00483604 |
| 1552405_at   | NALP5        | -41,3 | 0,00483604 |
| 227692_at    | GNAI1        | -41,3 | 0          |
| 213238_at    | ATP10D       | -41,2 | 0,00679705 |
| 218871_x_at  | GALNACT-2    | -41,1 | 0          |
| 236717_at    | LOC165186    | -41,0 | 0,00912068 |
| 218247_s_at  | RKHD2        | -40,7 | 0          |
| 238890_at    | AI791303     | -40,6 | 0          |
| 230300_at    | Hs.586550    | -40,5 | 0,01361431 |
| 236219_at    | AI452512     | -40,5 | 0,05893542 |
| 213996_at    | YPEL1        | -40,5 | 0          |
| 202323_s_at  | ACBD3        | -40,5 | 0,05893542 |
| 213922_at    | TTBK2        | -40,5 | 0,01361431 |
| 214451_at    | TFAP2B       | -40,1 | 0          |
| 219362_at    | MAK10        | -39,8 | 0,01361431 |
| 222361_at    | LOC643224    | -39,6 | 0,02565228 |
| 209566_at    | INSIG2       | -39,6 | 0          |
| 209043_at    | PAPSS1       | -38,8 | 0          |
| 233841_s_at  | SUDS3        | -38,6 | 0          |
| 201865_x_at  | NR3C1        | -38,3 | 0,00679705 |
| 225706_at    | GLCCI1       | -37,8 | 0,01361431 |
| 231944_at    | ERO1LB       | -37,8 | 0          |
| 225387_at    | TSPAN5       | -37,6 | 0          |
| 214683_s_at  | CLK1         | -37,6 | 0          |
| 228980_at    | RFFL         | -37,1 | 0,01715523 |
| 201841_s_at  | HSPB1        | -36,7 | 0,26525376 |
| 1562209_at   | LOC285429    | -36,7 | 0          |
| 213216_at    | OTUD3        | -36,4 | 0,03875166 |
| 209631_s_at  | GPR37        | -36,3 | 0          |
| 239642_at    | Hs.593807    | -36,3 | 0,00679705 |
| 1555074_a_at | KCNH5        | -36,2 | 0,03875166 |
| 201847_at    | LIPA         | -36,1 | 0,00679705 |
| 225710_at    | Hs.173030    | -35,8 | 0,01715523 |
| 201133_s_at  | PJA2         | -35,7 | 0,01361431 |
| 244317_at    | KIAA1324L    | -35,7 | 0          |
| 209706_at    | NKX3-1       | -35,7 | 0,15345984 |
| 200914_x_at  | KTN1         | -35,7 | 0          |
| 213331_s_at  | NEK1         | -35,6 | 0,00483604 |
| 231448_at    | Tenr         | -35,6 | 0          |
| 218170_at    | ISOC1        | -35,5 | 0          |
| 227806_at    | MGC17624     | -35,5 | 0,05893542 |
| 203810_at    | DNAJB4       | -35,4 | 0          |



|             |         |      |            |
|-------------|---------|------|------------|
| 200853_at   | H2AFZ   | 67,4 | 0,00382982 |
| 225152_at   | ZNF622  | 67,0 | 0          |
| 38157_at    | DOM3Z   | 67,0 | 0,03875166 |
| 227118_s_at | MRPS26  | 66,4 | 0,00679705 |
| 226014_at   | EIF3S5  | 66,4 | 0          |
| 204309_at   | CYP11A1 | 66,1 | 0,05893542 |

|              |          |       |            |
|--------------|----------|-------|------------|
| 235588_at    | ESCO2    | -35,4 | 0,02565228 |
| 202850_at    | ABCD3    | -35,3 | 0          |
| 235828_at    | MGC21644 | -35,2 | 0,01361431 |
| 204369_at    | PIK3CA   | -35,2 | 0,09957446 |
| 227204_at    | PARD6G   | -35,2 | 0,00483604 |
| 1559954_s_at | DDX42    | -34,9 | 0,01361431 |

**Supplementary Table S4:** The 200 most up- and down-regulated in the BL compared with the EGA stage in human. EGA, embryonic genome activation stage; BL, blastocysts.

| Gene ID     | Gene Name | Fold Change | q-value(%) | Gene ID      | Gene Name | Fold Change | q-value(%) |
|-------------|-----------|-------------|------------|--------------|-----------|-------------|------------|
| 201596_x_at | KRT18     | 583,4       | 0          | 1553619_a_at | TRIM43    | -563,5      | 0,03145261 |
| 216379_x_at | CD24      | 130,0       | 0,01763649 | 205899_at    | CCNA1     | -214,8      | 0          |
| 220139_at   | DNMT3L    | 117,2       | 0          | 206140_at    | LHX2      | -212,5      | 0,03145261 |
| 202286_s_at | TACSTD2   | 102,4       | 0,05147485 | 244206_at    | ANUBL1    | -176,2      | 0          |
| 200832_s_at | SCD       | 101,8       | 0          | 1552405_at   | NALP5     | -118,2      | 0,03145261 |
| 209710_at   | GATA2     | 96,5        | 0,02844238 | 225081_s_at  | CDCA7L    | -116,8      | 0,46529687 |
| 225520_at   | MTHFD1L   | 86,1        | 0,01763649 | 1552456_a_at | MBD3L2    | -113,7      | 0,02177985 |
| 212481_s_at | TPM4      | 82,9        | 0,02844238 | 209160_at    | AKR1C3    | -110,7      | 0          |
| 223168_at   | RHO       | 80,6        | 0          | 1559108_at   | VPS53     | -108,3      | 0,6041608  |
| 201903_at   | UQCRC1    | 80,5        | 0          | 216034_at    | SUHW1     | -107,3      | 0          |
| 223062_s_at | PSAT1     | 75,9        | 0,18873999 | 230748_at    | SLC16A6   | -105,4      | 0,0753266  |
| 201066_at   | CYC1      | 75,8        | 0          | 1570337_at   | FIGLA     | -101,9      | 0,02177985 |
| 228975_at   | SP6       | 72,5        | 1,61463267 | 232692_at    | TDRD6     | -101,5      | 0,05147485 |
| 200872_at   | S100A10   | 70,1        | 0          | 207443_at    | NR2E1     | -98,7       | 0,23707459 |
| 205967_at   | HIST1H4C  | 69,5        | 0          | 230626_at    | TSPAN12   | -97,3       | 1,14220607 |
| 201275_at   | FDPS      | 68,9        | 0          | 231756_at    | ZP4       | -96,4       | 0          |
| 200824_at   | GSTP1     | 65,4        | 0,02844238 | 236914_at    | AW080028  | -81,4       | 0,10846029 |
| 202090_s_at | UQCR      | 65,3        | 0,01763649 | 214603_at    | MAGEA2    | -77,9       | 0          |
| 209735_at   | ABCG2     | 63,9        | 0          | 1552531_a_at | NALP11    | -76,0       | 0          |
| 205450_at   | PHKA1     | 63,8        | 0          | 237131_at    | LOC645469 | -75,5       | 0,13454973 |
| 203665_at   | HMOX1     | 62,2        | 0,02844238 | 207936_x_at  | RFPL3     | -73,4       | 0,13454973 |
| 202626_s_at | LYN       | 58,5        | 0,10846029 | 229105_at    | GPR39     | -72,3       | 0,13454973 |
| 223207_x_at | PHPT1     | 57,1        | 0,05235772 | 226117_at    | TIFA      | -70,1       | 0,02177985 |
| 218721_s_at | C1orf27   | 53,9        | 0,0753266  | 219229_at    | SLCO3A1   | -69,5       | 0,05147485 |
| 209604_s_at | GATA3     | 53,3        | 0          | 219932_at    | SLC27A6   | -69,2       | 0,46529687 |
| 203108_at   | GPRC5A    | 52,4        | 0,34371104 | 217365_at    | PRAMEF5   | -68,2       | 0,81241439 |
| 202598_at   | S100A13   | 52,3        | 0,01763649 | 216001_at    | LOC390999 | -62,1       | 0,13454973 |
| 222986_s_at | SCOTIN    | 50,7        | 0          | 214612_x_at  | MAGEA6    | -61,9       | 0,02177985 |
| 201278_at   | DAB2      | 48,7        | 0,01763649 | 1556096_s_at | UNC13C    | -60,7       | 0          |
| 209146_at   | SC4MOL    | 45,9        | 0,02844238 | 234393_at    | HDAC9     | -60,3       | 0,05235772 |
| 230863_at   | Hs,595398 | 45,4        | 0          | 204124_at    | AF146796  | -59,2       | 0,0753266  |
| 201063_at   | RCN1      | 45,3        | 0          | 242334_at    | NALP4     | -59,1       | 0          |
| 227998_at   | S100A16   | 43,0        | 0          | 231118_at    | ANKRD35   | -56,2       | 0,03145261 |
| 210367_s_at | PTGES     | 42,1        | 0          | 205747_at    | CBLN1     | -55,7       | 0,10846029 |
| 225516_at   | SLC7A2    | 40,7        | 0,01763649 | 209942_x_at  | MAGEA3    | -55,6       | 0,03145261 |
| 222435_s_at | UBE2J1    | 40,6        | 0          | 239127_at    | Hs,446041 | -55,0       | 0,13454973 |
| 220525_s_at | AUP1      | 40,4        | 0          | 206404_at    | FGF9      | -54,9       | 1,14220607 |
| 201757_at   | NDUFS5    | 39,8        | 0          | 226271_at    | GDAP1     | -54,6       | 0          |
| 227829_at   | GYLTL1B   | 39,4        | 0          | 239061_at    | TPRXL     | -54,5       | 0          |
| 209265_s_at | METTL3    | 39,1        | 0          | 1557544_at   | C10orf80  | -54,0       | 0          |
| 201998_at   | ST6GAL1   | 39,0        | 0          | 236117_at    | Hs,42747  | -51,9       | 0          |
| 210087_s_at | MPZL1     | 38,0        | 0          | 236800_at    | C10orf49  | -51,1       | 0,23707459 |
| 212256_at   | GALNT10   | 37,5        | 0,02844238 | 1558111_at   | MBNL1     | -51,0       | 0,6041608  |
| 212137_at   | LARP1     | 37,3        | 0          | 216302_at    | HNRPC     | -50,3       | 0,23707459 |
| 201135_at   | ECHS1     | 37,0        | 0          | 220766_at    | BTG4      | -49,0       | 0,05147485 |
| 209682_at   | CBLB      | 36,8        | 0,6041608  | 230968_at    | Hs,444785 | -48,0       | 0,13454973 |
| 203098_at   | CDYL      | 36,4        | 0          | 229738_at    | DNAH10    | -47,9       | 0,6041608  |
| 208700_s_at | TKT       | 36,3        | 0          | 220410_s_at  | CAMSAP1   | -47,6       | 0,10846029 |
| 227042_at   | LOC150223 | 36,1        | 0          | 44783_s_at   | HEY1      | -45,7       | 0,10846029 |
| 221646_s_at | ZDHHC11   | 36,1        | 0,01763649 | 205113_at    | NEF3      | -45,6       | 0,0753266  |
| 224847_at   | CDK6      | 35,9        | 0,05147485 | 237464_at    | IMAA      | -45,6       | 0,23707459 |
| 222392_x_at | PERP      | 35,8        | 0          | 204920_at    | CPS1      | -44,5       | 0          |
| 212048_s_at | YARS      | 33,9        | 0          | 231448_at    | Tenr      | -44,1       | 0          |
| 208710_s_at | AP3D1     | 33,4        | 0          | 1554671_a_at | SRRM2     | -43,1       | 0,46529687 |
| 203416_at   | CD53      | 32,9        | 0,05147485 | 238021_s_at  | LOC643911 | -42,5       | 0          |
| 201250_s_at | SLC2A1    | 32,6        | 0,01763649 | 1557146_a_at | FLJ32252  | -42,0       | 0,18873999 |
| 209120_at   | NR2F2     | 32,0        | 1,14220607 | 202388_at    | RGS2      | -41,5       | 0          |
| 201013_s_at | PAICS     | 31,8        | 0          | 227794_at    | GLYATL1   | -41,3       | 0          |
| 212372_at   | MYH10     | 31,6        | 0          | 220135_s_at  | SLC7A9    | -40,2       | 0          |
| 232165_at   | AL137725  | 31,2        | 0          | 209994_s_at  | ABCBI     | -40,1       | 0,13454973 |
| 217874_at   | SUCLG1    | 31,0        | 0          | 222835_at    | THSD4     | -39,2       | 0,02177985 |
| 200806_s_at | HSPD1     | 30,3        | 0,10846029 | 204784_s_at  | MLF1      | -38,9       | 0          |

|              |           |      |            |              |              |       |            |
|--------------|-----------|------|------------|--------------|--------------|-------|------------|
| 204044_at    | QPRT      | 30,0 | 0,02844238 | 230450_at    | AI806866     | -38,7 | 0,34371104 |
| 225739_at    | RAB11FIP4 | 29,2 | 0,01763649 | 226254_s_at  | KIAA1430     | -38,5 | 0,10846029 |
| 218639_s_at  | ZXDC      | 28,4 | 0,34371104 | 239155_at    | LOC653108    | -37,9 | 0,02177985 |
| 213969_x_at  | RPL29     | 28,0 | 0          | 219352_at    | HERC6        | -37,8 | 0,03145261 |
| 226538_at    | MAN2A1    | 27,3 | 0          | 240318_at    | AFMID        | -37,0 | 0,05147485 |
| 212115_at    | C16orf34  | 26,8 | 0          | 205011_at    | LOH11CR2A    | -36,8 | 0,23707459 |
| 224972_at    | C20orf52  | 26,7 | 0          | 240031_at    | AA994467     | -36,6 | 1,14220607 |
| 35820_at     | GM2A      | 26,5 | 0          | 207819_s_at  | ABCB4        | -36,2 | 0,81241439 |
| 222400_s_at  | ADI1      | 26,4 | 0          | 1553891_at   | KLF17        | -35,5 | 0          |
| 205053_at    | PRIM1     | 26,4 | 0,01763649 | 230861_at    | DKFZP434L187 | -35,3 | 0,34371104 |
| 205417_s_at  | DAG1      | 26,4 | 0          | 229499_at    | CAPN13       | -35,2 | 0          |
| 227586_at    | LOC124491 | 26,0 | 0          | 207764_s_at  | HIPK3        | -34,6 | 0          |
| 201459_at    | RUVBL2    | 25,7 | 0          | 205051_s_at  | KIT          | -33,9 | 0,02177985 |
| 209600_s_at  | ACOX1     | 25,5 | 0,02844238 | 230645_at    | FRMD3        | -33,9 | 0,34371104 |
| 228204_at    | PSMB4     | 25,4 | 0          | 224444_s_at  | C1orf97      | -32,9 | 0,18873999 |
| 212191_x_at  | RPL13     | 25,1 | 0          | 220657_at    | KLHL11       | -32,8 | 0          |
| 210319_x_at  | MSX2      | 24,9 | 0,46529687 | 1555775_a_at | ZAR1         | -32,7 | 0,02177985 |
| 218160_at    | NDUFA8    | 24,5 | 0          | 230753_at    | LOC197135    | -31,3 | 0,02177985 |
| 214687_x_at  | ALDOA     | 24,3 | 0          | 235736_at    | Hs,178144    | -31,2 | 0,34371104 |
| 217168_s_at  | HERPUD1   | 24,1 | 0,01763649 | 1553086_at   | C11orf40     | -31,1 | 0,6041608  |
| 225799_at    | MGC4677   | 23,9 | 0          | 237210_at    | NFRKB        | -31,0 | 0,03145261 |
| 44654_at     | G6PC3     | 23,8 | 0          | 207623_at    | ABCF2        | -30,9 | 0,10846029 |
| 200658_s_at  | PHB       | 23,8 | 0          | 214243_s_at  | SERHL        | -30,8 | 0,10846029 |
| 228155_at    | C10orf58  | 23,7 | 0,01763649 | 214957_at    | ACTL8        | -30,7 | 0          |
| 223689_at    | IGF2BP1   | 23,3 | 0          | 213326_at    | VAMP1        | -30,5 | 0,03145261 |
| 223075_s_at  | C9orf58   | 22,7 | 0,18873999 | 205443_at    | SNAPC1       | -30,3 | 0,03145261 |
| 1560587_s_at | PRDX5     | 22,5 | 0          | 211915_s_at  | LOC649679    | -29,8 | 0          |
| 223206_s_at  | NMRAL1    | 22,3 | 0          | 222361_at    | LOC643224    | -29,4 | 0          |
| 224469_s_at  | C14orf151 | 22,2 | 0          | 220812_s_at  | HHLA2        | -29,4 | 0,05235772 |
| 224232_s_at  | PX19      | 22,0 | 0          | 236491_at    | BCL2L10      | -29,0 | 0,6041608  |
| 208722_s_at  | ANAPC5    | 22,0 | 0          | 1557085_at   | TMEM122      | -28,8 | 0,02177985 |
| 227492_at    | OCLN      | 21,9 | 0          | 220108_at    | GNA14        | -28,2 | 0,13454973 |
| 230204_at    | AU144114  | 21,9 | 0,02844238 | 230697_at    | BBS5         | -28,1 | 0,18873999 |
| 203113_s_at  | EEF1D     | 21,7 | 0          | 221314_at    | GDF9         | -27,9 | 0,03145261 |
| 244567_at    | Hs,125395 | 21,6 | 0,10846029 | 217047_s_at  | FAM13A1      | -27,8 | 0,13454973 |
| 226137_at    | Hs,569686 | 21,6 | 0,01763649 | 204776_at    | THBS4        | -27,3 | 0,02177985 |
| 207332_s_at  | TFRC      | 21,6 | 0          | 210162_s_at  | NFATC1       | -27,3 | 0,13454973 |
| 220289_s_at  | AIM1L     | 21,6 | 0,81241439 | 218929_at    | CARF         | -27,2 | 0          |
| 223165_s_at  | IHPK2     | 21,5 | 0,05235772 | 219686_at    | STK32B       | -27,2 | 0,6041608  |
| 217733_s_at  | TMSB10    | 21,5 | 0          | 231472_at    | FBXO15       | -26,4 | 0          |
| 228077_at    | MGC3207   | 21,2 | 0,01763649 | 236205_at    | Hs,13188     | -25,7 | 0,18873999 |
| 218140_x_at  | SRPRB     | 21,1 | 0          | 1557700_at   | POLH         | -25,7 | 0,46529687 |
| 208837_at    | TMED3     | 20,8 | 0          | 227337_at    | ANKRD37      | -25,6 | 0          |
| 201923_at    | PRDX4     | 20,8 | 0,02844238 | 224800_at    | WDFY1        | -25,2 | 0          |
| 229120_s_at  | CDC42SE1  | 20,7 | 0,01763649 | 224452_s_at  | MGC12966     | -25,0 | 0          |
| 202284_s_at  | CDKN1A    | 20,6 | 1,14220607 | 230789_at    | SUHW2        | -25,0 | 0,10846029 |
| 221750_at    | HMGCS1    | 20,6 | 0,13454973 | 205226_at    | PDGFRL       | -24,8 | 0,02177985 |
| 202289_s_at  | TACC2     | 20,5 | 0,01763649 | 228007_at    | C6orf204     | -24,8 | 0,23707459 |
| 227792_at    | LOC162073 | 20,3 | 0,05235772 | 205031_at    | EFNB3        | -24,6 | 0,46529687 |
| 229385_s_at  | AI743780  | 20,3 | 0,05147485 | 228454_at    | MLR2         | -24,3 | 0,13454973 |
| 203234_at    | UPP1      | 20,2 | 0          | 203855_at    | WDR47        | -24,3 | 0          |
| 218026_at    | CCDC56    | 20,2 | 0          | 243943_x_at  | C6orf52      | -23,7 | 0          |
| 203190_at    | NDUFS8    | 20,1 | 0          | 206010_at    | HABP2        | -23,7 | 0,03145261 |
| 202857_at    | TMEM4     | 20,1 | 0          | 225655_at    | UHRF1        | -23,1 | 0,02177985 |
| 214501_s_at  | H2AFY     | 20,0 | 0          | 241550_at    | DPPA5        | -23,1 | 0          |
| 225296_at    | ZNF317    | 19,9 | 0          | 210495_x_at  | FN1          | -22,6 | 0          |
| 209429_x_at  | EIF2B4    | 19,9 | 0          | 209392_at    | ENPP2        | -22,6 | 0          |
| 200862_at    | DHCR24    | 19,9 | 0,02844238 | 219508_at    | GCNT3        | -22,6 | 0,0753266  |
| 205047_s_at  | ASNS      | 19,8 | 0,13454973 | 242896_at    | BF223302     | -22,2 | 0          |
| 55081_at     | MICAL-L1  | 19,8 | 0,02844238 | 207067_s_at  | HDC          | -22,2 | 0,10846029 |
| 204437_s_at  | FOLR1     | 19,7 | 0,13454973 | 1553809_a_at | C9orf71      | -22,1 | 0,10846029 |
| 212230_at    | PPAP2B    | 19,6 | 0,81241439 | 228063_s_at  | NAP1L5       | -22,0 | 1,14220607 |
| 213011_s_at  | TPI1      | 19,3 | 0          | 220399_at    | FLJ22639     | -22,0 | 0,81241439 |
| 225391_at    | LOC93622  | 19,2 | 0,6041608  | 1555486_a_at | FLJ14213     | -22,0 | 2,29260383 |
| 201121_s_at  | PGRMC1    | 19,1 | 0,02844238 | 202464_s_at  | PFKFB3       | -21,9 | 0          |
| 201231_s_at  | ENO1      | 19,1 | 0          | 231292_at    | EID3         | -21,6 | 0,10846029 |

|              |              |      |            |              |           |       |            |
|--------------|--------------|------|------------|--------------|-----------|-------|------------|
| 211727_s_at  | COX11        | 19,1 | 0,02844238 | 243272_at    | Hs,99308  | -21,6 | 1,61463267 |
| 204416_x_at  | APOC1        | 19,1 | 0,02844238 | 231051_at    | SLC16A9   | -21,5 | 0          |
| 213187_x_at  | FTL          | 19,1 | 0,02844238 | 238218_at    | LOC648473 | -21,5 | 0          |
| 228499_at    | PFKFB4       | 19,1 | 0,01763649 | 231164_at    | LOC440331 | -21,4 | 0,03145261 |
| 203606_at    | NDUFS6       | 19,0 | 0          | 219947_at    | CLEC4A    | -21,4 | 0,03145261 |
| 223172_s_at  | MTP18        | 18,9 | 0,01763649 | 203355_s_at  | PSD3      | -21,2 | 0,02177985 |
| 202193_at    | LIMK2        | 18,9 | 0,02844238 | 226751_at    | C2orf32   | -21,1 | 0,0753266  |
| 221245_s_at  | C2orf31      | 18,8 | 0          | 237840_at    | LOC388948 | -21,0 | 0,23707459 |
| 206683_at    | ZNF165       | 18,8 | 0,02844238 | 209576_at    | GNAI1     | -20,7 | 0,03145261 |
| 204868_at    | ICT1         | 18,6 | 0,01763649 | 237613_at    | FOXR1     | -20,6 | 0,02177985 |
| 200897_s_at  | PALLD        | 18,4 | 0          | 203256_at    | CDH3      | -20,4 | 0,13454973 |
| 218526_s_at  | RANGNRF      | 18,4 | 0          | 220310_at    | TUBAL3    | -20,4 | 0          |
| 218035_s_at  | FLJ20273     | 18,4 | 0          | 225316_at    | MFSD2     | -20,2 | 0          |
| 202454_s_at  | ERBB3        | 18,3 | 3,15055114 | 218646_at    | FLJ20534  | -20,1 | 0          |
| 225432_s_at  | CSR2BP       | 18,1 | 0          | 228875_at    | C6orf189  | -20,1 | 0,46529687 |
| 225168_at    | FRMD4A       | 18,0 | 0,6041608  | 227997_at    | IL17RD    | -20,0 | 0,23707459 |
| 208308_s_at  | GPI          | 17,8 | 0          | 1554105_at   | FAM11A    | -19,9 | 0,05235772 |
| 219155_at    | PITPNC1      | 17,7 | 0,02844238 | 231386_at    | FLJ30851  | -19,9 | 0,18873999 |
| 228906_at    | CXXC6        | 17,7 | 0,02844238 | 229744_at    | SSFA2     | -19,8 | 1,61463267 |
| 1552946_at   | ZNF114       | 17,6 | 0,34371104 | 211596_s_at  | LRIG1     | -19,7 | 0,23707459 |
| 225342_at    | AK3L1        | 17,6 | 0,34371104 | 213452_at    | ZNF184    | -19,7 | 0,0753266  |
| 214022_s_at  | IFTM1        | 17,4 | 0,10846029 | 1561353_at   | Hs,385477 | -19,6 | 1,14220607 |
| 204975_at    | EMP2         | 17,4 | 0,02844238 | 1558438_a_at | IGHG1     | -19,2 | 0,02177985 |
| 200645_at    | GABARAP      | 17,3 | 0          | 210012_s_at  | EWSR1     | -19,0 | 0,18873999 |
| 206445_s_at  | PRMT1        | 17,3 | 0          | 232720_at    | LRRN6C    | -18,9 | 0,18873999 |
| 215091_s_at  | GTF3A        | 17,3 | 0          | 1562722_at   | FLJ40296  | -18,9 | 0,03145261 |
| 200812_at    | CCT7         | 17,2 | 0          | 230288_at    | AW418619  | -18,7 | 0,34371104 |
| 202475_at    | TMEM147      | 17,2 | 0          | 226153_s_at  | CNOT6L    | -18,7 | 0          |
| 233049_x_at  | STUB1        | 17,1 | 0          | 203705_s_at  | FZD7      | -18,7 | 0,10846029 |
| 224573_at    | MGC71993     | 17,1 | 0          | 37547_at     | PTHB1     | -18,6 | 0,81241439 |
| 210026_s_at  | CARD10       | 17,1 | 0,02844238 | 225798_at    | tcag7,981 | -18,6 | 0,10846029 |
| 217901_at    | DSG2         | 17,0 | 0          | 214481_at    | HIST1H2AM | -18,5 | 3,15055114 |
| 209109_s_at  | TSPAN6       | 16,8 | 0          | 1561673_at   | Hs,434703 | -18,3 | 0,13454973 |
| 225093_at    | UTRN         | 16,8 | 0          | 213271_s_at  | DOPEY1    | -18,3 | 0,03145261 |
| 218354_at    | HSPC176      | 16,7 | 0          | 219518_s_at  | ELL3      | -18,2 | 0,6041608  |
| 39729_at     | PRDX2        | 16,5 | 0          | 205190_at    | PLS1      | -18,1 | 0          |
| 213787_s_at  | EBP          | 16,3 | 0,02844238 | 204071_s_at  | TOPORS    | -18,0 | 0          |
| 44146_at     | GMEB2        | 16,2 | 0,0753266  | 223846_at    | AZI2      | -17,9 | 0,6041608  |
| 204119_s_at  | ADK          | 16,2 | 0          | 236904_x_at  | TECTA     | -17,6 | 0          |
| 201416_at    | SOX4         | 16,1 | 0          | 230847_at    | T79870    | -17,6 | 0,6041608  |
| 204306_s_at  | CD151        | 16,1 | 0,05147485 | 201174_s_at  | TERF2IP   | -17,6 | 0,18873999 |
| 200665_s_at  | SPARC        | 16,1 | 0,34371104 | 206588_at    | DAZL      | -17,5 | 0          |
| 200982_s_at  | ANXA6        | 15,9 | 0,10846029 | 1554789_a_at | PDE8B     | -17,5 | 0          |
| 226905_at    | FAM101B      | 15,8 | 0,18873999 | 230302_at    | Hs,264606 | -17,3 | 4,24774547 |
| 218499_at    | RP6-213H19,1 | 15,8 | 0,02844238 | 222921_s_at  | HEY2      | -17,3 | 0,46529687 |
| 207760_s_at  | NCOR2        | 15,8 | 0          | 222572_at    | PPM2C     | -17,0 | 0,03145261 |
| 209295_at    | TNFRSF10B    | 15,8 | 0,13454973 | 207490_at    | TUBA4     | -16,9 | 0,46529687 |
| 226121_at    | MGC23280     | 15,8 | 0,0753266  | 213220_at    | LOC92482  | -16,9 | 0,02177985 |
| 37117_at     | ARHGAP8      | 15,7 | 0,10846029 | 218807_at    | VAV3      | -16,7 | 0,34371104 |
| 213460_x_at  | NSUN5C       | 15,7 | 0,01763649 | 230854_at    | BCAR4     | -16,7 | 0,02177985 |
| 209154_at    | TAX1BP3      | 15,7 | 0          | 239715_at    | LOC400927 | -16,7 | 0,6041608  |
| 202961_s_at  | ATP5J2       | 15,6 | 0          | 220167_s_at  | TP53TG3   | -16,6 | 0,03145261 |
| 220864_s_at  | NDUFA13      | 15,6 | 0          | 227297_at    | ITGA9     | -16,5 | 1,61463267 |
| 224588_at    | XIST         | 15,6 | 0,46529687 | 205799_s_at  | SLC3A1    | -16,4 | 0,18873999 |
| 219041_s_at  | REPIN1       | 15,6 | 0          | 225930_at    | NKIRAS1   | -16,2 | 0          |
| 223222_at    | SLC25A19     | 15,5 | 0          | 229888_at    | C12orf60  | -16,2 | 0,13454973 |
| 201740_at    | NDUFS3       | 15,5 | 0          | 220019_s_at  | ZNF224    | -16,1 | 0,05235772 |
| 227897_at    | RAP2B        | 15,5 | 0          | 230542_at    | ZNF597    | -15,9 | 0,23707459 |
| 202054_s_at  | ALDH3A2      | 15,4 | 0,02844238 | 235948_at    | FAM80A    | -15,7 | 0,34371104 |
| 1555299_s_at | ERVWE1       | 15,4 | 0,02844238 | 220534_at    | TRIM48    | -15,7 | 1,14220607 |
| 202826_at    | SPINT1       | 15,4 | 0,05147485 | 214505_s_at  | FHL1      | -15,7 | 0          |
| 212501_at    | CEBPB        | 15,4 | 2,29260383 | 1555396_s_at | LOC340602 | -15,6 | 0,02177985 |
| 200871_s_at  | PSAP         | 15,3 | 0          | 202981_x_at  | SIAH1     | -15,3 | 0,03145261 |
| 209129_at    | TRIP6        | 15,3 | 0,34371104 | 205854_at    | TULP3     | -15,2 | 0,0753266  |
| 213670_x_at  | NSUN5B       | 15,2 | 0,05147485 | 243346_at    | LMOD3     | -15,1 | 0,10846029 |
| 208908_s_at  | CAST         | 15,2 | 0,10846029 | 239436_at    | CHORDC1   | -14,9 | 2,29260383 |

|             |        |      |            |              |           |       |            |
|-------------|--------|------|------------|--------------|-----------|-------|------------|
| 205133_s_at | HSPE1  | 15,2 | 0          | 242421_at    | Hs,613574 | -14,7 | 0,10846029 |
| 203025_at   | ARD1A  | 15,1 | 0          | 1553713_a_at | RHEBL1    | -14,6 | 0          |
| 218249_at   | ZDHHC6 | 15,0 | 0          | 1567623_at   | ABLIM2    | -14,6 | 0,81241439 |
| 226610_at   | PRR6   | 15,0 | 0,05147485 | 209034_at    | PNRC1     | -14,6 | 0          |
| 201268_at   | NME2   | 15,0 | 0          | 204709_s_at  | KIF23     | -14,5 | 0,05235772 |
| 210512_s_at | VEGF   | 15,0 | 0,6041608  | 1562275_at   | ADAMTS9   | -14,5 | 0,18873999 |

**Supplementary Table S5:** The 200 most down-regulated in the EGA compared with the MII stage in mouse.

MI, metaphase II oocytes; EGA, embryonic genome activation stage.

| Gene ID      | Gene Name     | Fold Change | q-value(%)  |
|--------------|---------------|-------------|-------------|
| 1427287_s_at | Itpr2         | -139,3      | 0           |
| 1419474_a_at | Ehf           | -129,1      | 0,578131308 |
| 1447830_s_at | Rgs2          | -127,7      | 0           |
| 1416518_at   | H1foo         | -125,0      | 0           |
| 1434031_at   | Zfp692        | -108,2      | 0           |
| 1416961_at   | Bub1b         | -105,1      | 0           |
| 1420196_s_at | Tbc1d14       | -94,4       | 0,091496987 |
| 1425869_a_at | Psen2         | -92,9       | 0,039876518 |
| 1448499_a_at | Ephx2         | -92,9       | 3,337876471 |
| 1416592_at   | Glrx          | -87,2       | 0           |
| 1428498_at   | Rnf219        | -83,6       | 0           |
| 1423086_at   | Npc1          | -82,3       | 0           |
| 1417483_at   | Nfkbiz        | -79,6       | 0           |
| 1428638_at   | Efhc2         | -75,0       | 0           |
| 1418925_at   | Celsr1        | -71,4       | 0           |
| 1438867_at   | Gm1070        | -69,1       | 0           |
| 1417904_at   | Dclre1a       | -67,1       | 0           |
| 1419041_at   | Itfg1         | -64,7       | 0           |
| 1427981_a_at | Csad          | -63,0       | 0           |
| 1434158_at   | Gmds          | -62,7       | 0           |
| 1443478_at   | C86695        | -60,7       | 0           |
| 1438658_a_at | S1pr3         | -58,9       | 0           |
| 1451191_at   | Crabp2        | -57,6       | 0           |
| 1451674_at   | Slc12a5       | -57,3       | 0           |
| 1452207_at   | Cited2        | -54,2       | 1,091655357 |
| 1430229_at   | Gpr137c       | -53,1       | 0           |
| 1434527_at   | Nlrp4b        | -52,6       | 0           |
| 1436884_x_at | Ewsr1         | -52,2       | 0,197774187 |
| 1424060_at   | Neil3         | -51,0       | 0           |
| 1454678_s_at | A130022J15Rik | -50,9       | 0           |
| 1415917_at   | Mthfd1        | -50,5       | 0           |
| 1417046_at   | Nprl2         | -49,2       | 0           |
| 1431695_at   | Rph3al        | -48,3       | 0           |
| 1457976_at   | 2010002M12Rik | -47,5       | 0           |
| 1419511_at   | Msh4          | -47,3       | 0           |
| 1434494_at   | Zar1          | -46,9       | 0           |
| 1449925_at   | Cxcr3         | -46,9       | 0           |
| 1443679_at   | 2510003B16Rik | -46,6       | 0           |
| 1423723_s_at | Tardbp        | -46,4       | 0           |
| 1419091_a_at | Anxa2         | -45,5       | 2,048028413 |

|              |                             |       |             |
|--------------|-----------------------------|-------|-------------|
| 1424821_at   | LOC100046168 ///<br>Ndfip1  | -45,3 | 0           |
| 1434070_at   | Jag1                        | -44,7 | 0           |
| 1438769_a_at | Thyn1                       | -44,5 | 0           |
| 1424076_at   | Gdpd1                       | -43,6 | 0           |
| 1420931_at   | Mapk8                       | -42,5 | 0           |
| 1428259_at   | Pxdn                        | -42,2 | 0           |
| 1438445_at   | Lrrc8e                      | -41,9 | 0           |
| 1424536_at   | Oas1e                       | -41,4 | 0           |
| 1425049_at   | Oas1h                       | -40,5 | 0           |
| 1456017_x_at | LOC666466 /// Obox2         | -39,7 | 0           |
| 1432291_at   | 0610033M10Rik               | -39,3 | 0           |
| 1447112_s_at | Cryl1                       | -39,0 | 0           |
| 1448999_at   | Trappc5                     | -38,1 | 0           |
| 1417049_at   | Rhd                         | -37,1 | 0           |
| 1415996_at   | Txnip                       | -36,9 | 0           |
| 1423570_at   | Abcg1                       | -35,5 | 0           |
| 1425567_a_at | Anxa5                       | -35,3 | 0           |
| 1422899_at   | Slc6a20b                    | -35,3 | 0           |
| 1449059_a_at | Oxct1                       | -35,1 | 0           |
| 1417538_at   | LOC100046775 ///<br>Slc35a1 | -34,7 | 0           |
| 1442081_at   | Gm4632                      | -34,5 | 0           |
| 1417438_at   | Rdh14                       | -34,4 | 0           |
| 1456183_at   | Oog4                        | -34,2 | 0           |
| 1415722_a_at | Vta1                        | -33,9 | 0           |
| 1446845_at   | Gm5065                      | -32,5 | 0           |
| 1427085_at   | 2810432D09Rik               | -32,2 | 0           |
| 1436948_a_at | Fam70a                      | -32,2 | 0,039876518 |
| 1421133_at   | LOC100047693 ///<br>Pvr13   | -32,1 | 0           |
| 1455435_s_at | Chdh                        | -32,1 | 0           |
| 1435461_at   | Magi3                       | -31,5 | 0           |
| 1431230_a_at | Btbd9 ///<br>LOC100048111   | -30,9 | 0           |
| 1419665_a_at | Nupr1                       | -30,8 | 3,337876471 |
| 1415806_at   | Plat                        | -30,8 | 0           |
| 1415864_at   | Bpgm                        | -30,3 | 0           |
| 1452621_at   | Pcbd2                       | -30,1 | 0           |
| 1428384_at   | D4Bwg0951e                  | -29,8 | 0           |
| 1429291_at   | Psm1                        | -29,5 | 0           |
| 1424114_s_at | Lamb1-1                     | -29,5 | 0           |
| 1415677_at   | Dhrs1                       | -28,7 | 0           |
| 1460122_at   | Tmem41b                     | -28,5 | 0           |
| 1439991_a_at | Pabpn11                     | -28,1 | 0           |
| 1450915_at   | Ap3b1                       | -27,7 | 0           |

|              |               |       |             |
|--------------|---------------|-------|-------------|
| 1415947_at   | Creg1         | -27,6 | 0,197774187 |
| 1415698_at   | Golm1         | -27,6 | 0           |
| 1440556_at   | Gm11985       | -27,5 | 0           |
| 1433972_at   | Camta1        | -27,5 | 0           |
| 1449108_at   | Fdx1          | -27,0 | 0,136811798 |
| 1441945_s_at | Abhd14a       | -26,9 | 0,022595242 |
| 1438077_at   | Nlrp4a        | -26,8 | 0           |
| 1428985_at   | Ints12        | -26,8 | 0           |
| 1452837_at   | Lpin2         | -26,7 | 0           |
| 1420903_at   | St6galnac3    | -26,6 | 0,022595242 |
| 1427031_s_at | Ccdc52        | -26,5 | 0           |
| 1424042_at   | Tmem5         | -26,4 | 0           |
| 1423301_at   | Copb1         | -26,3 | 0           |
| 1427964_at   | Cmtm8         | -26,3 | 0           |
| 1450720_at   | Acp1          | -26,2 | 0           |
| 1428045_a_at | Elf2          | -25,5 | 0,091496987 |
| 1431772_a_at | Itsn2         | -25,5 | 0           |
| 1420174_s_at | Tax1bp1       | -25,4 | 0           |
| 1446919_at   | Zfp873        | -25,4 | 0           |
| 1419716_a_at | Pou2f1        | -25,3 | 0           |
| 1434830_at   | Mxd1          | -25,3 | 0           |
| 1448172_at   | Mdh1          | -25,0 | 0           |
| 1439721_at   | Fbxw18        | -24,7 | 0           |
| 1448317_at   | Tmem128       | -24,6 | 0,039876518 |
| 1437370_at   | Sgol2         | -24,2 | 0           |
| 1423786_at   | 8430410A17Rik | -24,2 | 0           |
| 1424299_at   | Oma1          | -24,0 | 0,022595242 |
| 1452671_s_at | Lman1         | -24,0 | 0           |
| 1416032_at   | Tmem109       | -24,0 | 0           |
| 1429265_a_at | Rnf130        | -24,0 | 0           |
| 1418815_at   | Cdh2          | -24,0 | 0           |
| 1416509_at   | Tm9sf3        | -24,0 | 0           |
| 1441295_at   | Lman21        | -23,9 | 0           |
| 1457084_at   | Nlrp9b        | -23,9 | 0           |
| 1438971_x_at | Ube2h         | -23,8 | 0           |
| 1437307_at   | Senp8         | -23,7 | 0           |
| 1433579_at   | Tmem30b       | -23,3 | 0           |
| 1445723_at   | Plcl1         | -23,2 | 0           |
| 1448319_at   | Akr1b3        | -23,2 | 0           |
| 1436419_a_at | 1700097N02Rik | -23,0 | 0           |
| 1459252_at   | Gm4981        | -23,0 | 0           |
| 1415840_at   | Elov15        | -22,9 | 0           |
| 1457028_at   | A430033K04Rik | -22,9 | 0,022595242 |
| 1418437_a_at | Mlx           | -22,9 | 0           |
| 1448120_at   | Gdf9          | -22,8 | 0           |
| 1449130_at   | Cd1d1         | -22,6 | 0           |



|              |                                  |       |             |
|--------------|----------------------------------|-------|-------------|
| 1420808_at   | Gm6768 /// Ncoa4                 | -22,6 | 0           |
| 1456721_at   | Thsd7a                           | -22,6 | 0           |
| 1452828_at   | Fbxo21                           | -22,5 | 0           |
| 1448398_s_at | Rpl22                            | -22,5 | 0           |
| 1418539_a_at | Ptpre                            | -22,5 | 0,091496987 |
| 1455823_at   | Bbs4                             | -22,3 | 0           |
| 1434963_at   | Supt3h                           | -22,3 | 1,091655357 |
| 1423297_at   | Add3                             | -22,2 | 0           |
| 1433940_at   | Spag7                            | -22,1 | 0           |
| 1451177_at   | Dnajb4                           | -22,1 | 0           |
| 1417527_at   | Ap3m2                            | -22,0 | 0           |
| 1447173_at   | Lrrc31                           | -21,9 | 0           |
| 1418109_at   | Gspt2                            | -21,9 | 0           |
| 1436899_at   | Zufsp                            | -21,9 | 0           |
| 1436588_at   | Rttm                             | -21,8 | 0           |
| 1452199_at   | Tmem209                          | -21,8 | 0           |
| 1427163_at   | Ubr2                             | -21,7 | 0           |
| 1415791_at   | Rnf34                            | -21,7 | 0           |
| 1453155_at   | Tmem50a                          | -21,7 | 0           |
| 1436242_a_at | Cklf                             | -21,7 | 0           |
| 1417245_at   | Gpr180                           | -21,6 | 0           |
| 1429506_at   | LOC634379 /// Nkd1               | -21,4 | 0           |
| 1453090_x_at | LOC666466 /// Obox1<br>/// Obox2 | -21,4 | 0           |
| 1428023_at   | 3110009E18Rik                    | -21,4 | 0           |
| 1424138_at   | Rhbdf1                           | -21,0 | 0,039876518 |
| 1438653_x_at | Atxn10                           | -20,9 | 3,337876471 |
| 1460257_a_at | Gm2382 /// Mthfs                 | -20,9 | 0           |
| 1439046_at   | Ccdc55                           | -20,8 | 0,039876518 |
| 1460123_at   | Gpr1                             | -20,8 | 0           |
| 1416226_at   | Arpc1b                           | -20,6 | 0           |
| 1428905_at   | Rraga                            | -20,6 | 0,091496987 |
| 1448470_at   | Fbp1                             | -20,6 | 0           |
| 1456185_at   | Nlrp9a                           | -20,6 | 0           |
| 1429679_at   | Lrrc17                           | -20,4 | 0           |
| 1441534_at   | C86753                           | -20,4 | 0           |
| 1451391_at   | 2700050L05Rik                    | -20,3 | 0           |
| 1452087_at   | Epsti1                           | -20,3 | 0           |
| 1416846_a_at | Pdzrn3                           | -20,2 | 0           |
| 1455066_s_at | Mia3                             | -20,2 | 0           |
| 1454782_at   | Bai3                             | -20,1 | 0           |
| 1415679_at   | Psenen                           | -19,8 | 0           |
| 1451302_at   | 1110012L19Rik                    | -19,8 | 0           |
| 1458438_at   | Ccdc122                          | -19,7 | 0           |
| 1416270_at   | Polr2g                           | -19,6 | 0           |
| 1428243_at   | 1700021K19Rik                    | -19,6 | 0           |

|              |                             |       |             |
|--------------|-----------------------------|-------|-------------|
| 1423568_at   | Psma7                       | -19,6 | 0,197774187 |
| 1453700_s_at | 4933403O03Rik ///<br>Gm4981 | -19,5 | 0,312577673 |
| 1424442_a_at | Pja2                        | -19,5 | 0,136811798 |
| 1437755_at   | Slc5a12                     | -19,5 | 0           |
| 1428682_at   | Zc3h6                       | -19,5 | 0           |
| 1424080_at   | Dcps                        | -19,3 | 0           |
| 1430735_at   | Patl2                       | -19,3 | 0           |
| 1454262_at   | Fbxw27                      | -19,2 | 0           |
| 1434753_at   | Nfrkb                       | -19,2 | 0           |
| 1424218_a_at | Creb3l4                     | -19,2 | 0           |
| 1424686_at   | Heatr6                      | -19,2 | 0           |
| 1448509_at   | Fam107b                     | -19,1 | 0           |
| 1451283_at   | Fam114a2                    | -19,0 | 0           |
| 1448910_at   | Pecr                        | -19,0 | 0           |
| 1459897_a_at | Sbsn                        | -19,0 | 3,337876471 |
| 1427957_at   | 9530008L14Rik               | -18,8 | 0           |
| 1424370_s_at | Psmf1                       | -18,7 | 0           |
| 1419630_a_at | Trim11                      | -18,7 | 0           |
| 1426417_at   | Yipf4                       | -18,3 | 0           |
| 1451756_at   | Flt1                        | -18,3 | 0           |
| 1436181_at   | Asap2                       | -18,3 | 0           |
| 1449329_at   | Zfp235                      | -18,2 | 0           |
| 1448971_at   | 2410022L05Rik               | -18,2 | 0           |
| 1448445_at   | Acp6                        | -18,2 | 0           |
| 1451924_a_at | Edn1                        | -18,1 | 0           |
| 1415897_a_at | Mgst1                       | -18,1 | 3,337876471 |
| 1460353_at   | Tmem48                      | -18,1 | 0           |

**Supplementary Table S6:** The 200 most up- and down-regulated in the BL compared with the MII stage in mouse. MII, metaphase II oocytes; BL, blastocysts.

| Gene ID      | Gene Name              | Fold Change | q-value(%) | Gene ID      | Gene Name                         | Fold Change | q-value(%) |
|--------------|------------------------|-------------|------------|--------------|-----------------------------------|-------------|------------|
| 1417116_at   | Slc6a8                 | 269,5       | 0          | 1455851_at   | Bmp5                              | -160,0      | 0          |
| 1448263_a_at | Cndp2                  | 174,8       | 0          | 1423226_at   | Ms4a1                             | -108,4      | 0          |
| 1417346_at   | Pycard                 | 137,8       | 0          | 1432291_at   | 0610033M10Rik                     | -102,2      | 0          |
| 1427893_a_at | Pmvk                   | 78,6        | 0          | 1455823_at   | Bbs4                              | -83,2       | 0          |
| 1450107_a_at | Renbp                  | 55,2        | 0          | 1449824_at   | Prg4                              | -75,9       | 0          |
| 1452049_at   | Rpl7l1                 | 49,2        | 0          | 1455914_at   | AI987944                          | -75,0       | 0          |
| 1436816_at   | Nup133                 | 43,1        | 0          | 1435667_at   | Rims1                             | -74,1       | 0          |
| 1416278_a_at | Atp5o /// LOC100047429 | 42,4        | 0          | 1440856_at   | Mapk8                             | -73,3       | 0          |
| 1416604_at   | Cyc1                   | 39,7        | 0          | 1435261_at   | Tmtc1                             | -70,5       | 0          |
| 1447934_at   | 9630033F20Rik          | 38,9        | 0          | 1454782_at   | Bai3                              | -70,1       | 0          |
| 1449137_at   | Pdha1                  | 36,7        | 0          | 1438297_at   | AA545190                          | -69,1       | 0          |
| 1419509_a_at | Nagk                   | 35,4        | 0          | 1426708_at   | Antxr2                            | -66,7       | 0          |
| 1438000_x_at | Zip622                 | 34,9        | 0          | 1428682_at   | Zc3h6                             | -60,1       | 0          |
| 1423724_at   | Zwint                  | 34,4        | 0          | 1448557_at   | Fam13c                            | -59,6       | 0          |
| 1452880_at   | Znhit3                 | 34,3        | 0          | 1422021_at   | Spry4                             | -58,0       | 0          |
| 1416789_at   | Idh3g                  | 32,7        | 0          | 1439167_at   | Pecr                              | -57,8       | 0          |
| 1416146_at   | Hspa4                  | 32,4        | 0          | 1449925_at   | Cxcr3                             | -55,9       | 0          |
| 1451336_at   | Lgals4                 | 31,5        | 0          | 1429303_at   | Klf17                             | -55,7       | 0          |
| 1416478_a_at | Mdh2                   | 31,1        | 0          | 1451191_at   | Crabp2                            | -50,5       | 0          |
| 1415681_at   | Mrpl43                 | 30,2        | 0          | 1427278_at   | Clip4                             | -50,1       | 0          |
| 1449061_a_at | Prim1                  | 29,8        | 0          | 1430200_at   | 4930579D07Rik ///<br>LOC100044513 | -49,0       | 0          |
| 1451401_a_at | Mul1                   | 29,8        | 0          | 1448136_at   | Enpp2                             | -47,7       | 0          |
| 1424313_a_at | Ndufs7                 | 29,6        | 0          | 1452088_at   | Zbed3                             | -45,3       | 0          |
| 1452048_at   | Mrpl12                 | 29,4        | 0          | 1460081_at   | Syt7                              | -44,4       | 0          |
| 1453120_at   | Tmx4                   | 29,0        | 0          | 1440782_at   | Skap1                             | -44,2       | 0          |
| 1424877_a_at | Alad /// LOC100046072  | 28,1        | 0          | 1434830_at   | Mxd1                              | -44,1       | 0          |
| 1424200_s_at | Seh1l                  | 27,4        | 0          | 1439059_at   | Fam199x                           | -42,7       | 0          |
| 1434702_at   | Ddrgk1                 | 27,3        | 0          | 1441122_at   | LOC639236                         | -42,4       | 0          |
| 1451248_at   | Prmt7                  | 27,0        | 0          | 1417129_a_at | Meis2                             | -41,4       | 0          |
| 1453207_at   | 2900053A13Rik          | 26,9        | 0          | 1421065_at   | Jak2                              | -41,3       | 0          |
| 1452680_at   | Snrpd2                 | 26,9        | 0          | 1420851_at   | Pard6g                            | -39,0       | 0          |
| 1434923_at   | Cox19                  | 26,9        | 0          | 1424631_a_at | Ighg                              | -38,9       | 0          |
| 1424628_a_at | Ndufv3                 | 26,8        | 0          | 1453166_at   | Ccdc109a                          | -38,8       | 0          |
| 1448314_at   | Cdk1                   | 26,8        | 0          | 1454962_at   | Spire1                            | -38,8       | 0          |
| 1452628_at   | Bag5 /// LOC100047042  | 26,2        | 0          | 1430897_at   | 4931428L18Rik                     | -38,7       | 0          |
| 1438159_x_at | Ndufv2                 | 26,1        | 0          | 1418659_at   | Clock                             | -38,6       | 0          |
| 1455333_at   | Tns3                   | 25,9        | 0          | 1421240_at   | Ern1                              | -38,6       | 0          |
| 1437220_x_at | Psmc13                 | 25,9        | 0          | 1450923_at   | Tgfb2                             | -38,2       | 0          |
| 1455106_a_at | Ckb                    | 25,5        | 0          | 1419542_at   | Dazl                              | -38,2       | 0          |
| 1423049_a_at | Tpm1                   | 24,9        | 0          | 1421594_a_at | Sytl2                             | -38,0       | 0          |
| 1424001_at   | Mki67ip                | 24,8        | 0          | 1437112_at   | Pld1                              | -37,7       | 0          |
| 1449004_at   | Mrpl46                 | 24,2        | 0          | 1460255_at   | Tnfsf13b                          | -37,5       | 0          |
| 1422517_a_at | Znrd1                  | 24,0        | 0          | 1445473_at   | Diras2                            | -37,1       | 0          |
| 1435995_at   | Mrpl22                 | 22,8        | 0          | 1417644_at   | Sspn                              | -36,6       | 0          |
| 1418794_at   | Cds2                   | 22,7        | 0          | 1456741_s_at | Gpm6a                             | -36,5       | 0          |
| 1415676_a_at | Psmb5                  | 22,2        | 0          | 1429759_at   | Rps6ka6                           | -35,8       | 0          |
| 1452954_at   | Ube2c                  | 22,0        | 0          | 1456033_at   | Tbx4                              | -35,5       | 0          |
| 1416020_a_at | Atp5g1                 | 22,0        | 0          | 1421514_a_at | LOC100047360 /// Scml2            | -34,9       | 0          |
| 1423991_at   | Nop14                  | 22,0        | 0          | 1419434_at   | Slc2a10                           | -34,5       | 0          |
| 1428322_a_at | Ndufb10                | 21,9        | 0          | 1440476_at   | D6Ert474e                         | -34,4       | 0          |
| 1417105_at   | Trappc2l               | 21,6        | 0          | 1435660_at   | LOC664787                         | -33,6       | 0          |
| 1418124_at   | Tmem85                 | 21,5        | 0          | 1451476_at   | Zdhc8                             | -33,2       | 0          |
| 1451015_at   | Tkt                    | 21,4        | 0          | 1443478_at   | C86695                            | -32,8       | 0          |
| 1428766_at   | Rnmt1                  | 21,4        | 0          | 1417331_a_at | Arl6                              | -32,4       | 0          |
| 1448882_at   | Tmem93                 | 21,1        | 0          | 1452604_at   | Stard13                           | -32,1       | 0          |
| 1416608_a_at | BC004004               | 21,0        | 0          | 1433919_at   | Asb4                              | -32,1       | 0          |
| 1430500_s_at | Mtx2                   | 20,9        | 0          | 1434252_at   | Tmcc3                             | -31,9       | 0          |
| 1450818_a_at | Ndufa7                 | 20,7        | 0          | 1429475_at   | LOC677224 /// Ubash3b             | -31,9       | 0          |
| 1424033_at   | Sfrs7                  | 20,7        | 0          | 1419231_s_at | Krt12                             | -31,2       | 0          |
| 1416438_at   | Puf60                  | 20,5        | 0          | 1425846_a_at | Caln1                             | -31,2       | 0          |
| 1422912_at   | Bmp4                   | 20,4        | 0          | 1437732_at   | Omt2a                             | -30,7       | 0          |
| 1417448_at   | 1810008A18Rik          | 20,2        | 0          | 1425776_a_at | C87436                            | -30,4       | 0          |
| 1451521_x_at | Eif4h                  | 20,1        | 0          | 1456425_at   | 9230115E21Rik                     | -30,3       | 0          |
| 1448802_at   | Nufip1                 | 20,0        | 0          | 1424822_at   | Slain1                            | -29,7       | 0          |
| 1451002_at   | Aco2                   | 19,9        | 0          | 1419403_at   | BC017612                          | -29,7       | 0          |
| 1423670_a_at | Srpr                   | 19,3        | 0          | 1457401_at   | Dnahc9                            | -29,0       | 0          |
| 1438317_a_at | Endog                  | 19,0        | 0          | 1448556_at   | Prlr                              | -28,1       | 0          |
| 1434113_a_at | Rexo4                  | 18,9        | 0          | 1428899_at   | Tmem182                           | -28,1       | 0          |
| 1428658_at   | Pin4                   | 18,8        | 0          | 1460606_at   | Hsd17b13                          | -27,9       | 0          |
| 1416627_at   | Spint1                 | 18,8        | 0          | 1437312_at   | Bmpr1b                            | -27,8       | 0          |
| 1436302_at   | Slc10a7                | 18,7        | 0          | 1435992_at   | Iqca                              | -27,7       | 0          |

|              |                              |      |   |              |                                                                        |       |   |
|--------------|------------------------------|------|---|--------------|------------------------------------------------------------------------|-------|---|
| 1450919_at   | Mpp1                         | 18,6 | 0 | 1440215_at   | Gm11818                                                                | -27,4 | 0 |
| 1424019_at   | Nop2                         | 18,4 | 0 | 1455321_at   | Ddhd1                                                                  | -27,1 | 0 |
| 1419287_at   | Tmem208                      | 18,3 | 0 | 1456299_at   | E330012B07Rik                                                          | -26,9 | 0 |
| 1440826_s_at | 2610002I17Rik                | 18,1 | 0 | 1420715_a_at | Pparg                                                                  | -26,9 | 0 |
| 1424500_at   | Utp6                         | 18,1 | 0 | 1448269_a_at | Klh13                                                                  | -26,6 | 0 |
| 1416276_a_at | Rps4x                        | 18,0 | 0 | 1423328_at   | Gdap1                                                                  | -26,5 | 0 |
| 1453097_a_at | Ubf                          | 18,0 | 0 | 1447786_at   | Cyth1                                                                  | -26,2 | 0 |
| 1453052_at   | Tmem192                      | 17,9 | 0 | 1434834_at   | Socs7                                                                  | -26,1 | 0 |
| 1420000_s_at | Igfbp1                       | 17,8 | 0 | 1434440_at   | Gnai1                                                                  | -26,0 | 0 |
| 1416240_at   | Psmb7                        | 17,8 | 0 | 1439480_at   | Gm10857                                                                | -25,9 | 0 |
| 1433882_at   | Cnot10                       | 17,5 | 0 | 1419511_at   | Msh4                                                                   | -25,9 | 0 |
| 1422128_at   | Rpl14                        | 17,0 | 0 | 1419110_at   | Riok1                                                                  | -25,8 | 0 |
| 1434543_a_at | Bola2                        | 16,9 | 0 | 1431356_at   | 6430710C18Rik                                                          | -25,8 | 0 |
| 1427988_s_at | Safb2                        | 16,7 | 0 | 1420928_at   | St6gal1                                                                | -25,8 | 0 |
| 1424776_a_at | Slc25a28                     | 16,5 | 0 | 1424218_a_at | Creb314                                                                | -25,8 | 0 |
| 1416417_a_at | Ndufb7                       | 16,5 | 0 | 1418685_at   | Tirap                                                                  | -25,7 | 0 |
| 1415967_at   | Ndufv1                       | 16,3 | 0 | 1459044_at   | AU015558                                                               | -25,7 | 0 |
| 1416667_at   | Ebp                          | 16,1 | 0 | 1455856_at   | Gm1965                                                                 | -25,6 | 0 |
| 1450657_at   | Ppie                         | 16,1 | 0 | 1450105_at   | Adam10                                                                 | -25,4 | 0 |
| 1426674_at   | Eif3b                        | 15,7 | 0 | 1427359_at   | Jhdm1d                                                                 | -25,1 | 0 |
| 1435006_s_at | Abcb7                        | 15,7 | 0 | 1427252_at   | Dmrtb1                                                                 | -24,7 | 0 |
| 1425196_a_at | Hint2                        | 15,6 | 0 | 1460611_at   | C87499                                                                 | -24,6 | 0 |
| 1416368_at   | Gsta4                        | 15,4 | 0 | 1435385_at   | Tshz2                                                                  | -24,6 | 0 |
| 1416070_a_at | Ddx18                        | 15,3 | 0 | 1429679_at   | Lrrc17                                                                 | -24,5 | 0 |
| 1452616_s_at | Ssbp1                        | 15,3 | 0 | 1417806_at   | Popdc2                                                                 | -24,5 | 0 |
| 1451745_a_at | Znhit1                       | 15,2 | 0 | 1444232_at   | Prkg1                                                                  | -24,4 | 0 |
| 1416327_at   | Ufc1                         | 15,2 | 0 | 1451535_at   | Il31ra                                                                 | -24,2 | 0 |
| 1450638_at   | Pdcd5                        | 15,0 | 0 | 1431772_a_at | Itsn2                                                                  | -24,2 | 0 |
| 1438164_x_at | Flot2                        | 14,9 | 0 | 1417179_at   | Tspan5                                                                 | -24,0 | 0 |
| 1451272_a_at | Ube2f                        | 14,9 | 0 | 1416650_at   | Rfpl4                                                                  | -23,9 | 0 |
| 1418101_a_at | Rtn3                         | 14,7 | 0 | 1460665_a_at | Cnot7                                                                  | -23,9 | 0 |
| 1424651_at   | Acsf3                        | 14,7 | 0 | 1434592_at   | Slc16a10                                                               | -23,8 | 0 |
| 1426846_at   | Cenpt                        | 14,6 | 0 | 1427253_s_at | Suz12                                                                  | -23,8 | 0 |
| 1416663_at   | Ndufa9                       | 14,6 | 0 | 1428696_at   | Rftn1                                                                  | -23,8 | 0 |
| 1416773_at   | Wee1                         | 14,5 | 0 | 1434228_at   | Pdp1                                                                   | -23,8 | 0 |
| 1424538_at   | Ubl4                         | 14,4 | 0 | 1419354_at   | Klf7                                                                   | -23,5 | 0 |
| 1425993_a_at | Hsph1                        | 14,4 | 0 | 1456221_at   | Gm10632                                                                | -23,5 | 0 |
| 1448524_s_at | Ssr4                         | 14,3 | 0 | 1434469_at   | Otud4                                                                  | -23,4 | 0 |
| 1429485_a_at | Utp111                       | 14,3 | 0 | 1455266_at   | Kif5c                                                                  | -23,2 | 0 |
| 1452128_a_at | Brc3                         | 14,1 | 0 | 1417336_a_at | Sytl4                                                                  | -23,1 | 0 |
| 1420623_x_at | Hspa8                        | 14,1 | 0 | 1417677_at   | Opn3                                                                   | -23,1 | 0 |
| 1424058_at   | Prrc1                        | 14,0 | 0 | 1429114_at   | Sestd1                                                                 | -22,9 | 0 |
| 1428898_at   | Mon1a                        | 14,0 | 0 | 1436861_at   | Il7                                                                    | -22,5 | 0 |
| 1456727_a_at | Csnk1d                       | 14,0 | 0 | 1436721_x_at | Oog3                                                                   | -22,5 | 0 |
| 1454856_x_at | Rpl35                        | 13,9 | 0 | 1419629_at   | Mesp2                                                                  | -22,4 | 0 |
| 1452186_at   | Rbm5                         | 13,8 | 0 | 1425099_a_at | Arntl                                                                  | -22,4 | 0 |
| 1448234_at   | Dnajb6                       | 13,6 | 0 | 1425190_a_at | Phospho2                                                               | -22,3 | 0 |
| 1426902_at   | Coq6                         | 13,6 | 0 | 1441128_at   | 2900016J10Rik                                                          | -22,1 | 0 |
| 1423741_at   | Rbm10                        | 13,5 | 0 | 1418872_at   | Abcb1b                                                                 | -22,0 | 0 |
| 1438656_x_at | Timm17b                      | 13,5 | 0 | 1428306_at   | Ddit4                                                                  | -21,9 | 0 |
| 1417737_at   | Mrps31                       | 13,4 | 0 | 1422831_at   | Fbn2                                                                   | -21,8 | 0 |
| 1438835_a_at | Eftud2                       | 13,4 | 0 | 1455872_at   | Fam167a                                                                | -21,6 | 0 |
| 1436722_a_at | Actb                         | 13,3 | 0 | 1436805_at   | Ubash3b                                                                | -21,6 | 0 |
| 1450705_at   | Rdbp                         | 13,3 | 0 | 1456847_at   | Cd160                                                                  | -21,6 | 0 |
| 1456055_x_at | Pold1                        | 13,3 | 0 | 1437469_at   | Zfp750                                                                 | -21,4 | 0 |
| 1452586_at   | Anapc13                      | 13,2 | 0 | 1454917_at   | Alg10b                                                                 | -21,4 | 0 |
| 1437414_at   | Zfp217                       | 13,1 | 0 | 1429110_a_at | Nsun4                                                                  | -21,3 | 0 |
| 1448604_at   | Uck2                         | 13,0 | 0 | 1427956_at   | Pcgf1                                                                  | -21,2 | 0 |
| 1450968_at   | Uqcrfs1                      | 12,9 | 0 | 1442013_at   | Ccdc79                                                                 | -21,0 | 0 |
| 1451081_a_at | Tcf25                        | 12,9 | 0 | 1433865_at   | E330010L02Rik ///<br>E330016L19Rik /// Gm2101<br>/// Gm2309 /// Gm7479 | -20,8 | 0 |
| 1456117_at   | Rrp1b                        | 12,8 | 0 | 1423371_at   | Pole4                                                                  | -20,6 | 0 |
| 1418965_at   | Nosip                        | 12,8 | 0 | 1450730_at   | Hs2st1                                                                 | -20,6 | 0 |
| 1416243_a_at | Gm10269 /// Gm4342 /// Rpl35 | 12,8 | 0 | 1416542_at   | Phf1                                                                   | -20,5 | 0 |
| 1417698_at   | Gtf2f1                       | 12,7 | 0 | 1438466_at   | Dnahc7b                                                                | -20,4 | 0 |
| 1420616_at   | Ash2l                        | 12,7 | 0 | 1448733_at   | Bmi1                                                                   | -20,3 | 0 |
| 1420830_x_at | Ywhaq                        | 12,7 | 0 | 1417977_at   | Eif4e3                                                                 | -20,3 | 0 |
| 1450865_s_at | Mrps24                       | 12,6 | 0 | 1456684_at   | Tmem74                                                                 | -20,3 | 0 |
| 1439764_s_at | Igf2bp2                      | 12,5 | 0 | 1454867_at   | Mn1                                                                    | -20,2 | 0 |
| 1424451_at   | Acaa1b                       | 12,4 | 0 | 1450069_a_at | Celf2                                                                  | -20,2 | 0 |
| 1452919_a_at | Pgp                          | 12,4 | 0 | 1434070_at   | Jag1                                                                   | -20,1 | 0 |
| 1424364_a_at | Uqcr10                       | 12,4 | 0 | 1417226_at   | Fbxw4                                                                  | -20,1 | 0 |
| 1433611_s_at | Bud31                        | 12,3 | 0 | 1450129_a_at | Socs6                                                                  | -19,9 | 0 |
| 1447724_x_at | Opa3                         | 12,3 | 0 | 1425481_at   | Cnot6l                                                                 | -19,8 | 0 |
| 1423080_at   | Tomm20                       | 12,3 | 0 | 1420455_at   | Gcm2                                                                   | -19,8 | 0 |

|              |                         |      |   |              |                                 |       |   |
|--------------|-------------------------|------|---|--------------|---------------------------------|-------|---|
| 1454709_at   | Tmem64                  | 12,3 | 0 | 1420860_at   | Itga9                           | -19,6 | 0 |
| 1417873_at   | Pwp1                    | 12,3 | 0 | 1457435_x_at | Myom2                           | -19,6 | 0 |
| 1451421_a_at | Rogdi                   | 12,2 | 0 | 1417926_at   | Ncapg2                          | -19,5 | 0 |
| 1416256_a_at | Tubb5                   | 12,1 | 0 | 1437415_at   | 4933427D06Rik                   | -19,3 | 0 |
| 1417390_at   | Gpn1                    | 12,1 | 0 | 1423186_at   | Tiam2                           | -19,2 | 0 |
| 1452169_a_at | Dgkz                    | 12,1 | 0 | 1455710_x_at | Mtcp1                           | -19,2 | 0 |
| 1437301_a_at | Dvl1                    | 12,0 | 0 | 1428789_at   | Ralgps2                         | -19,2 | 0 |
| 1454214_a_at | Znhit6                  | 11,9 | 0 | 1415677_at   | Dhrs1                           | -19,1 | 0 |
| 1451083_s_at | Aars                    | 11,9 | 0 | 1459089_at   | Gm11756 /// Gm11757 /// Gm13871 | -19,0 | 0 |
| 1424696_at   | Gpr89                   | 11,9 | 0 | 1455865_at   | Insm1                           | -19,0 | 0 |
| 1425616_a_at | Ccdc23                  | 11,9 | 0 | 1435749_at   | Gda                             | -18,9 | 0 |
| 1427966_at   | Fam105b                 | 11,9 | 0 | 1439571_at   | E230008J23Rik                   | -18,9 | 0 |
| 1434157_at   | Txlna                   | 11,8 | 0 | 1428243_at   | 1700021K19Rik                   | -18,9 | 0 |
| 1428004_at   | Snmp25                  | 11,8 | 0 | 1415731_at   | Angel2                          | -18,8 | 0 |
| 1416472_at   | Syap1                   | 11,7 | 0 | 1460220_a_at | Csf1                            | -18,7 | 0 |
| 1436803_a_at | Ndufb9                  | 11,7 | 0 | 1422824_s_at | Eps8                            | -18,6 | 0 |
| 1416366_at   | Ndufc2                  | 11,7 | 0 | 1419588_at   | Spag1                           | -18,6 | 0 |
| 1424109_a_at | Glo1                    | 11,6 | 0 | 1451221_at   | BC018507                        | -18,6 | 0 |
| 1426644_at   | Tbc1d20                 | 11,5 | 0 | 1451510_s_at | Olah                            | -18,5 | 0 |
| 1439017_x_at | Adipor1                 | 11,4 | 0 | 1415890_at   | Papss1                          | -18,3 | 0 |
| 1423616_at   | Tarbp2                  | 11,2 | 0 | 1417676_a_at | Ptpro                           | -18,3 | 0 |
| 1452446_a_at | Tmub2                   | 11,2 | 0 | 1439945_at   | Zfp449                          | -18,3 | 0 |
| 1422476_at   | Ifi30                   | 11,2 | 0 | 1437299_at   | Nlrp4g                          | -18,3 | 0 |
| 1423889_at   | Gm5617                  | 11,1 | 0 | 1424029_at   | Tspyl4                          | -18,2 | 0 |
| 1427909_at   | 2410015M20Rik           | 11,1 | 0 | 1442659_at   | Pcdh9                           | -18,1 | 0 |
| 1420013_s_at | Lss                     | 11,1 | 0 | 1431564_at   | Bcar3                           | -18,0 | 0 |
| 1427901_at   | Mrps18c                 | 11,1 | 0 | 1453247_at   | Zfp618                          | -18,0 | 0 |
| 1416059_at   | LOC100048726 /// Sec23b | 11,0 | 0 | 1416125_at   | Fkbp5                           | -18,0 | 0 |
| 1417511_at   | Lyar                    | 11,0 | 0 | 1423754_at   | Ifitm3                          | -17,9 | 0 |
| 1417321_at   | Zcchc7                  | 11,0 | 0 | 1436314_at   | Scyl2                           | -17,7 | 0 |
| 1450948_a_at | Mrpl1                   | 11,0 | 0 | 1424054_at   | Btbd2                           | -17,7 | 0 |
| 1451736_a_at | Map2k7                  | 10,9 | 0 | 1418749_at   | Psd3                            | -17,5 | 0 |
| 1428589_at   | Mrpl41                  | 10,8 | 0 | 1417430_at   | Cdr2                            | -17,5 | 0 |
| 1423264_at   | Bop1                    | 10,8 | 0 | 1444712_at   | Hsf5                            | -17,3 | 0 |
| 1424347_at   | Ppp6c                   | 10,7 | 0 | 1442544_at   | Igh-6                           | -17,3 | 0 |
| 1416679_at   | Abcd3                   | 10,5 | 0 | 1433751_at   | Slc39a10                        | -17,2 | 0 |
| 1428075_at   | Gm3244 /// Ndufb4       | 10,5 | 0 | 1456183_at   | Oog4                            | -17,1 | 0 |
| 1426453_at   | Pitrm1                  | 10,4 | 0 | 1427023_at   | Phyhip1                         | -17,1 | 0 |
| 1426257_a_at | Sars                    | 10,3 | 0 | 1421881_a_at | Elavl2                          | -17,0 | 0 |
| 1426256_at   | Timm17a                 | 10,2 | 0 | 1416981_at   | Foxo1                           | -17,0 | 0 |
| 1428381_a_at | Pdpd1                   | 10,2 | 0 | 1416267_at   | Scoc                            | -16,9 | 0 |
| 1418578_at   | Dgka                    | 10,2 | 0 | 1415904_at   | Lpl                             | -16,9 | 0 |
| 1452454_at   | Sdad1                   | 10,2 | 0 | 1423470_at   | Ptbp2                           | -16,8 | 0 |
| 1421945_a_at | Rpf2                    | 10,1 | 0 | 1417555_at   | Atad1                           | -16,8 | 0 |
| 1415980_at   | Atp5g2                  | 10,1 | 0 | 1428260_at   | Atl1                            | -16,8 | 0 |
| 1429453_a_at | Mrpl55                  | 10,1 | 0 | 1426523_a_at | Gnpda2                          | -16,5 | 0 |
| 1424047_at   | Dera                    | 10,0 | 0 | 1425330_a_at | Gm7895 /// Ppm1b                | -16,5 | 0 |
| 1423801_a_at | Aprt                    | 10,0 | 0 | 1417483_at   | Nfkbiz                          | -16,4 | 0 |
| 1448621_a_at | Smpd1                   | 10,0 | 0 | 1433894_at   | Jazf1                           | -16,4 | 0 |
| 1415683_at   | Nmt1                    | 9,9  | 0 | 1428353_at   | Foxk2                           | -16,3 | 0 |
| 1448589_at   | Ndufb5                  | 9,9  | 0 | 1452087_at   | Epsti1                          | -16,2 | 0 |
| 1438644_x_at | Commd9                  | 9,8  | 0 | 1448892_at   | Dock7                           | -16,1 | 0 |
| 1435243_at   | Zfp746                  | 9,8  | 0 | 1436518_at   | Usp46                           | -16,1 | 0 |
| 1434119_at   | D2Wsu81e                | 9,8  | 0 | 1457179_at   | Nlrp4e                          | -16,1 | 0 |
| 1455832_a_at | Umps                    | 9,8  | 0 | 1424131_at   | Col6a3                          | -16,0 | 0 |

**Supplementary Table S7:** The 200 most up- and the 3 down-regulated in the BL compared with the EGA stage in mouse.  
 EGA, embryonic genome activation stage; BL, blastocysts.

| Gene ID      | Gene Name                 | Fold Change | q-value(%) | Gene ID    | Gene Name                                                                                                      | Fold Change | q-value(%) |
|--------------|---------------------------|-------------|------------|------------|----------------------------------------------------------------------------------------------------------------|-------------|------------|
| 1422075_at   | Cdx2                      | 1103,3      | 0,2799642  | 1427479_at | BB287469 /// Eif1a ///<br>Gm2022 /// Gm4027 ///<br>Gm5039 /// Gm5662 ///<br>Gm5788 /// Gm6804 ///<br>LOC641136 | -87,6       | 4,0435592  |
| 1420647_a_at | Krt8                      | 585,8       | 0,2799642  | 1460065_at | AA763515                                                                                                       | -21,7       | 4,0435592  |
| 1416225_at   | Adh1                      | 369,6       | 0,3384012  | 1441275_at | Kbtbd8                                                                                                         | -6,5        | 4,0435592  |
| 1456642_x_at | S100a10                   | 363,7       | 0,3384012  |            |                                                                                                                |             |            |
| 1416790_a_at | Gm5806 /// Gm9855 /// Tdg | 300,5       | 0,2206964  |            |                                                                                                                |             |            |
| 1456174_x_at | Ndrgr1                    | 278,5       | 0,3727146  |            |                                                                                                                |             |            |
| 1419091_a_at | Anxa2                     | 275,0       | 0,2799642  |            |                                                                                                                |             |            |
| 1428146_s_at | Acaa2                     | 266,3       | 0,157687   |            |                                                                                                                |             |            |
| 1434909_at   | Rragd                     | 251,7       | 0,3384012  |            |                                                                                                                |             |            |
| 1415947_at   | Creg1                     | 237,6       | 0,1013274  |            |                                                                                                                |             |            |
| 1417185_at   | Ly6a                      | 214,3       | 1,7053108  |            |                                                                                                                |             |            |
| 1435176_a_at | Id2                       | 194,8       | 0,3727146  |            |                                                                                                                |             |            |
| 1416023_at   | Fabp3                     | 170,0       | 0,2092861  |            |                                                                                                                |             |            |
| 1416531_at   | Gsto1                     | 167,7       | 0,1013274  |            |                                                                                                                |             |            |
| 1429377_at   | 2410004A20Rik             | 165,9       | 0,2206964  |            |                                                                                                                |             |            |
| 1455439_a_at | Lgals1                    | 157,6       | 0          |            |                                                                                                                |             |            |
| 1448894_at   | Akr1b8                    | 147,5       | 0,2206964  |            |                                                                                                                |             |            |
| 1424572_a_at | H2afy                     | 146,3       | 0,2799642  |            |                                                                                                                |             |            |
| 1417125_at   | Ahcy                      | 146,2       | 0,1013274  |            |                                                                                                                |             |            |
| 1450138_a_at | Serpinb6a                 | 143,9       | 0,1013274  |            |                                                                                                                |             |            |
| 1420000_s_at | Igbb1                     | 141,1       | 0          |            |                                                                                                                |             |            |
| 1422128_at   | Rpl14                     | 134,4       | 0          |            |                                                                                                                |             |            |
| 1449024_a_at | Hexa                      | 134,1       | 0,2799642  |            |                                                                                                                |             |            |
| 1417777_at   | Ptgr1                     | 117,0       | 0,2799642  |            |                                                                                                                |             |            |
| 1418133_at   | Bcl3                      | 114,6       | 0,3245931  |            |                                                                                                                |             |            |
| 1450989_at   | Tdgf1                     | 112,8       | 1,2786576  |            |                                                                                                                |             |            |
| 1417116_at   | Slc6a8                    | 112,2       | 0          |            |                                                                                                                |             |            |
| 1428464_at   | Ndufa3                    | 108,2       | 0,157687   |            |                                                                                                                |             |            |
| 1417285_a_at | Ndufa5                    | 105,4       | 0,157687   |            |                                                                                                                |             |            |
| 1451112_s_at | Dap                       | 100,6       | 0,2799642  |            |                                                                                                                |             |            |
| 1448393_at   | Cldn7                     | 90,8        | 0,3245931  |            |                                                                                                                |             |            |
| 1422851_at   | Hmga2                     | 90,0        | 0,2206964  |            |                                                                                                                |             |            |
| 1455972_x_at | Hadh                      | 88,0        | 0,157687   |            |                                                                                                                |             |            |
| 1438653_x_at | Atxn10                    | 86,2        | 0,2799642  |            |                                                                                                                |             |            |
| 1447604_at   | BC053393                  | 85,2        | 0,2206964  |            |                                                                                                                |             |            |
| 1429265_a_at | Rnfl30                    | 84,1        | 0,1013274  |            |                                                                                                                |             |            |
| 1416119_at   | Txn1                      | 79,5        | 0,3727146  |            |                                                                                                                |             |            |
| 1427133_s_at | Lrp2                      | 71,2        | 0,2799642  |            |                                                                                                                |             |            |
| 1429311_at   | Ube2q1                    | 70,2        | 0          |            |                                                                                                                |             |            |
| 1423692_at   | Ndufa8                    | 69,4        | 0          |            |                                                                                                                |             |            |
| 1424353_at   | Lrpprc                    | 67,9        | 0,157687   |            |                                                                                                                |             |            |
| 1418711_at   | Pdgfa                     | 67,8        | 0,2206964  |            |                                                                                                                |             |            |
| 1448956_at   | Stard10                   | 65,8        | 0,157687   |            |                                                                                                                |             |            |
| 1454678_s_at | A130022J15Rik             | 65,4        | 0          |            |                                                                                                                |             |            |
| 1455333_at   | Tns3                      | 65,2        | 0          |            |                                                                                                                |             |            |
| 1433509_s_at | Reep1                     | 63,2        | 0,3384012  |            |                                                                                                                |             |            |
| 1417349_at   | Pldn                      | 60,2        | 0,2799642  |            |                                                                                                                |             |            |
| 1433559_at   | Slc45a4                   | 59,6        | 0,1013274  |            |                                                                                                                |             |            |
| 1419812_s_at | Ccdc56                    | 58,9        | 0,2092861  |            |                                                                                                                |             |            |
| 1448573_a_at | Ceacam10                  | 58,3        | 1,7053108  |            |                                                                                                                |             |            |
| 1416592_at   | Glrx                      | 56,6        | 0,3727146  |            |                                                                                                                |             |            |
| 1423716_s_at | Atp5d                     | 56,0        | 0          |            |                                                                                                                |             |            |
| 1419289_a_at | Syngr1                    | 55,2        | 0,1013274  |            |                                                                                                                |             |            |
| 1426715_s_at | Slc46a1                   | 53,9        | 0,3245931  |            |                                                                                                                |             |            |
| 1436349_at   | 2700094K13Rik             | 53,9        | 0,2092861  |            |                                                                                                                |             |            |
| 1453572_a_at | Plp2                      | 52,8        | 0,1013274  |            |                                                                                                                |             |            |
| 1428181_at   | Etfb                      | 52,4        | 0,1013274  |            |                                                                                                                |             |            |
| 1425464_at   | Gata6                     | 52,4        | 0,157687   |            |                                                                                                                |             |            |
| 1423596_at   | Nek6                      | 50,6        | 0          |            |                                                                                                                |             |            |
| 1433504_at   | Pygb                      | 50,5        | 0,157687   |            |                                                                                                                |             |            |
| 1437723_s_at | Derl1                     | 50,1        | 0,2799642  |            |                                                                                                                |             |            |
| 1424562_a_at | Slc25a4                   | 49,5        | 0,1013274  |            |                                                                                                                |             |            |
| 1417052_at   | Psemb3                    | 49,4        | 0,2206964  |            |                                                                                                                |             |            |
| 1433467_at   | Slc7a6                    | 49,1        | 0,3384012  |            |                                                                                                                |             |            |
| 1433883_at   | Tpm4                      | 48,8        | 0,3245931  |            |                                                                                                                |             |            |
| 1426981_at   | Pcsk6                     | 47,9        | 0,2799642  |            |                                                                                                                |             |            |
| 1424345_s_at | Ube2m                     | 47,4        | 0,6644655  |            |                                                                                                                |             |            |
| 1434067_at   | Al662270                  | 47,2        | 0,5161509  |            |                                                                                                                |             |            |

|              |                          |      |           |
|--------------|--------------------------|------|-----------|
| 1424184_at   | Acadvl                   | 46,9 | 0,2799642 |
| 1423568_at   | Psm7                     | 46,4 | 0,1013274 |
| 1437454_a_at | Tmx2                     | 45,7 | 0,2799642 |
| 1449575_a_at | Gstp1                    | 45,5 | 0,1013274 |
| 1429701_at   | Mageb16                  | 45,4 | 0,2092861 |
| 1451418_a_at | Spsb4                    | 45,2 | 0         |
| 1436884_x_at | Ewsr1                    | 44,8 | 0,2799642 |
| 1422836_at   | Mbnl3                    | 44,7 | 0,8103388 |
| 1416257_at   | Capn2                    | 44,6 | 0,3727146 |
| 1417443_at   | Fam151a                  | 44,4 | 0,2799642 |
| 1436902_x_at | Gm9844 /// Tmsb10        | 43,0 | 0,2206964 |
| 1416009_at   | Tspan3                   | 42,8 | 0,6644655 |
| 1415834_at   | Dusp6                    | 42,6 | 0,3245931 |
| 1415891_at   | Suclg1                   | 42,4 | 0,1013274 |
| 1455286_at   | Btbd1                    | 42,3 | 0,3384012 |
| 1415779_s_at | Actg1                    | 42,1 | 0,2799642 |
| 1438610_a_at | Cryz                     | 41,6 | 0,2799642 |
| 1433519_at   | Nucks1                   | 41,2 | 0,2799642 |
| 1452446_a_at | Tmub2                    | 41,1 | 0         |
| 1455019_x_at | Ckap4                    | 40,9 | 0         |
| 1424877_a_at | Alad /// LOC100046072    | 40,8 | 0         |
| 1418091_at   | Tcfcp211                 | 40,0 | 0,2799642 |
| 1450878_at   | Sri                      | 39,6 | 0         |
| 1436722_a_at | Actb                     | 39,4 | 0         |
| 1452111_at   | Mrps35                   | 39,0 | 0         |
| 1435493_at   | Dsp                      | 38,8 | 0,3384012 |
| 1426690_a_at | Srebf1                   | 38,6 | 0         |
| 1416271_at   | Perp                     | 38,5 | 0,3384012 |
| 1422476_at   | Ifi30                    | 38,3 | 0         |
| 1428373_at   | Ip6k2                    | 38,0 | 0,2799642 |
| 1455391_at   | Rad23a                   | 37,7 | 0,3245931 |
| 1436640_x_at | Agpat4                   | 37,7 | 0         |
| 1450668_s_at | Hspe1                    | 37,2 | 0,1013274 |
| 1422567_at   | Fam129a                  | 37,0 | 0,2799642 |
| 1452716_at   | 5730469M10Rik            | 36,9 | 0,6644655 |
| 1423588_at   | Arpc4                    | 36,8 | 0,157687  |
| 1452207_at   | Cited2                   | 36,3 | 0,3727146 |
| 1424038_a_at | 2310044H10Rik            | 36,1 | 0         |
| 1424991_s_at | Tyms /// Tyms-ps         | 36,1 | 0         |
| 1419041_at   | Itfg1                    | 34,9 | 0         |
| 1458218_s_at | Pde7a                    | 34,8 | 0,3727146 |
| 1417737_at   | Mrps31                   | 34,6 | 0         |
| 1418417_at   | Msc                      | 34,5 | 0,2206964 |
| 1434963_at   | Supt3h                   | 34,1 | 2,1743407 |
| 1424048_a_at | Cyb5r1                   | 33,9 | 0,2206964 |
| 1451247_at   | Mfsd1                    | 33,8 | 0,2206964 |
| 1418038_s_at | Dusp19                   | 33,6 | 0         |
| 1450721_at   | Acp1                     | 33,3 | 0         |
| 1421996_at   | Tcfap2a                  | 33,0 | 0,8103388 |
| 1417392_a_at | Slc7a7                   | 33,0 | 0,2799642 |
| 1416449_x_at | Stxbp2                   | 32,9 | 0,2206964 |
| 1415759_a_at | Hbxip                    | 32,8 | 0         |
| 1435450_at   | Cpne3                    | 32,5 | 0,2799642 |
| 1417240_at   | Zyx                      | 32,4 | 0,8103388 |
| 1430596_s_at | Vgll3                    | 32,2 | 0,8103388 |
| 1436609_a_at | Lrpap1                   | 32,2 | 0,2206964 |
| 1437624_x_at | Nudt16l1                 | 32,2 | 0,1013274 |
| 1416509_at   | Tm9sf3                   | 32,2 | 0,2799642 |
| 1434923_at   | Cox19                    | 31,9 | 0         |
| 1452740_at   | Myh10                    | 31,9 | 0,2799642 |
| 1424400_a_at | Aldh111 /// LOC100047937 | 31,9 | 0,2799642 |
| 1416604_at   | Cyc1                     | 31,9 | 0         |
| 1434031_at   | Zfp692                   | 31,8 | 0,3727146 |
| 1437423_a_at | Sra1                     | 31,2 | 0         |
| 1428075_at   | Gm3244 /// Ndufb4        | 31,1 | 0         |
| 1453001_at   | Rnaseh2b                 | 30,9 | 0,2092861 |
| 1423960_at   | Lpcat3                   | 30,9 | 0,3384012 |
| 1428314_at   | Pcnp                     | 30,9 | 0,2799642 |
| 1418347_at   | Ccdc22                   | 30,9 | 0         |
| 1441980_at   | C030007I09Rik            | 30,5 | 0,5161509 |
| 1428283_at   | Cyp2s1                   | 30,5 | 0,3727146 |
| 1454641_at   | Cggbp1                   | 30,4 | 0,3384012 |
| 1448563_at   | Phb                      | 30,4 | 0         |
| 1450627_at   | Ank                      | 30,0 | 0,2206964 |
| 1453207_at   | 2900053A13Rik            | 30,0 | 0         |
| 1448353_x_at | Rpn1                     | 29,8 | 0         |

|              |                         |      |           |
|--------------|-------------------------|------|-----------|
| 1423086_at   | Npc1                    | 29,8 | 0         |
| 1422178_a_at | Rab17                   | 29,6 | 0,3245931 |
| 1416368_at   | Gsta4                   | 29,6 | 0         |
| 1448485_at   | Ggt1                    | 29,0 | 0,2799642 |
| 1438672_at   | Parvb                   | 29,0 | 0,6644655 |
| 1437992_x_at | Gja1                    | 28,9 | 0,2799642 |
| 1455680_at   | 9630025H16Rik /// Kpna4 | 28,8 | 0,6644655 |
| 1417177_at   | Galk1                   | 28,8 | 0,2799642 |
| 1452225_at   | 2010106G01Rik           | 28,8 | 0,2799642 |
| 1416948_at   | Mrpl23                  | 28,6 | 0,1013274 |
| 1449450_at   | Ptges                   | 28,6 | 0,2206964 |
| 1430176_at   | Kbtbd13                 | 28,4 | 0,6644655 |
| 1456390_at   | Ppp2ca                  | 28,3 | 0,3245931 |
| 1425788_a_at | Echdc2                  | 28,2 | 0,6644655 |
| 1426001_at   | Eomes                   | 28,1 | 0,2799642 |
| 1428546_at   | Syncrip                 | 27,9 | 0,3245931 |
| 1449412_at   | 1810046J19Rik           | 27,7 | 0,3384012 |
| 1460235_at   | Scarb2                  | 27,7 | 0,2092861 |
| 1456377_x_at | Limd2                   | 27,6 | 0,3727146 |
| 1419181_at   | Zfp326                  | 27,1 | 1,2786576 |
| 1425680_a_at | Btrc                    | 26,9 | 0         |
| 1438835_a_at | Eftud2                  | 26,8 | 0         |
| 1433489_s_at | Fgfr2                   | 26,8 | 0,5161509 |
| 1448491_at   | Ech1                    | 26,7 | 0,1013274 |
| 1422608_at   | Arpp19 /// LOC632823    | 26,5 | 0         |
| 1455435_s_at | Chdh                    | 26,5 | 0,8103388 |
| 1415738_at   | Txndc12                 | 26,4 | 0,2092861 |
| 1448886_at   | Gata3                   | 26,3 | 0,2799642 |
| 1423419_at   | Lig3                    | 26,3 | 0         |
| 1456439_x_at | Mical1                  | 26,3 | 0         |
| 1417364_at   | Eef1g /// LOC100047986  | 26,3 | 0,157687  |
| 1460592_at   | Epb4.111                | 26,2 | 1,2786576 |
| 1426400_a_at | Capns1                  | 26,1 | 0         |
| 1428619_at   | Fam36a                  | 25,8 | 0,3727146 |
| 1424293_s_at | Tmem55a                 | 25,8 | 0,2206964 |
| 1448118_a_at | Ctsd                    | 25,8 | 0,2799642 |
| 1448372_a_at | Cnpy2                   | 25,8 | 0,157687  |
| 1445940_at   | D4Erd298e               | 25,5 | 0,2799642 |
| 1424344_s_at | Eif1a                   | 25,5 | 0,2799642 |
| 1435140_at   | Ide                     | 25,3 | 0,157687  |
| 1437223_s_at | Xbp1                    | 25,3 | 0,3384012 |
| 1415916_a_at | Mthfd1                  | 25,3 | 0         |
| 1424442_a_at | Pja2                    | 25,2 | 0,1013274 |
| 1451512_s_at | Hibch                   | 25,0 | 0,2799642 |
| 1416142_at   | Rps6                    | 24,9 | 0,2799642 |
| 1423625_a_at | Dnajc19                 | 24,7 | 0,3245931 |
| 1417026_at   | Pfdn1                   | 24,6 | 0         |
| 1422433_s_at | Idh1                    | 24,5 | 0         |
| 1448967_at   | Nipsnap3b               | 24,4 | 0,2799642 |
| 1455898_x_at | Slc2a3                  | 24,4 | 0,2799642 |
| 1442223_at   | Enah                    | 24,2 | 0,5161509 |
| 1417059_at   | Krtcap2                 | 24,2 | 0,2799642 |
| 1451988_s_at | Chmp4b /// LOC674706    | 24,2 | 0,2206964 |
| 1438644_x_at | Comm9                   | 24,2 | 0         |
| 1436479_a_at | Dpp7                    | 24,0 | 0,2206964 |
| 1440167_s_at | Lpp                     | 24,0 | 0,1013274 |
